# Supplementary material for: Qualitative assessment of caregiver experiences when navigating childhood immunisation in urban communities in Sierra Leone
Source: PubMed Central journal article supplement — BMJ Open. 2022 May 9;12(5):e058203. doi: 10.1136/bmjopen-2021-058203 (PMC9086636; doi:10.1136/bmjopen-2021-058203), 2022-05-09
Supplement: bmjopen-2021-058203.draft_revisions.pdf [file bmjopen-2021-058203.draft_revisions.pdf]

# BMJ Open

BMJ Open is committed to open peer review. As part of this commitment we make the peer review history of every article we publish publicly available.

When an article is published we post the peer reviewers' comments and the authors' responses online. We also post the versions of the paper that were used during peer review. These are the versions that the peer review comments apply to.

The versions of the paper that follow are the versions that were submitted during the peer review process. They are not the versions of record or the final published versions. They should not be cited or distributed as the published version of this manuscript.

BMJ Open is an open access journal and the full, final, typeset and author-corrected version of record of the manuscript is available on our site with no access controls, subscription charges or pay-per-view fees (<http://bmjopen.bmj.com>).

If you have any questions on BMJ Open's open peer review process please email [info.bmjopen@bmj.com](mailto:info.bmjopen@bmj.com)

# BMJ Open

## Caregiver experiences when navigating childhood immunisation in urban communities in Sierra Leone

|                               |                                                                                                                                                                                                                                                                                                                                                                                                                                                                                                                                                                                                                                                                                    |
|-------------------------------|------------------------------------------------------------------------------------------------------------------------------------------------------------------------------------------------------------------------------------------------------------------------------------------------------------------------------------------------------------------------------------------------------------------------------------------------------------------------------------------------------------------------------------------------------------------------------------------------------------------------------------------------------------------------------------|
| Journal:                      | <i>BMJ Open</i>                                                                                                                                                                                                                                                                                                                                                                                                                                                                                                                                                                                                                                                                    |
| Manuscript ID                 | bmjopen-2021-058203                                                                                                                                                                                                                                                                                                                                                                                                                                                                                                                                                                                                                                                                |
| Article Type:                 | Original research                                                                                                                                                                                                                                                                                                                                                                                                                                                                                                                                                                                                                                                                  |
| Date Submitted by the Author: | 11-Oct-2021                                                                                                                                                                                                                                                                                                                                                                                                                                                                                                                                                                                                                                                                        |
| Complete List of Authors:     | Jalloh, Mohamed; Centers for Disease Control and Prevention, Center for Public Health<br>Patel, Palak; Centers for Disease Control and Prevention; Oak Ridge Institute for Science and Education,<br>Sutton, Roberta; ICAP at Columbia University<br>Kulkarni, Shibani; Centers for Disease Control and Prevention; Oak Ridge Institute for Science and Education,<br>Toure, Mame; ICAP at Columbia University<br>Wiley, Kerrie; The University of Sydney, School of Public Health<br>Sessay, Tom; Sierra Leone Ministry of Health and Sanitation<br>Lahuerta, Maria; ICAP at Columbia University; Columbia University Mailman School of Public Health, Department of Epidemiology |
| Keywords:                     | Public health < INFECTIOUS DISEASES, Community child health < PAEDIATRICS, Child protection < PAEDIATRICS                                                                                                                                                                                                                                                                                                                                                                                                                                                                                                                                                                          |
|                               |                                                                                                                                                                                                                                                                                                                                                                                                                                                                                                                                                                                                                                                                                    |

SCHOLARONE™  
Manuscripts

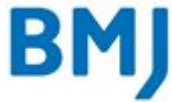

I, the Submitting Author has the right to grant and does grant on behalf of all authors of the Work (as defined in the below author licence), an exclusive licence and/or a non-exclusive licence for contributions from authors who are: i) UK Crown employees; ii) where BMJ has agreed a CC-BY licence shall apply, and/or iii) in accordance with the terms applicable for US Federal Government officers or employees acting as part of their official duties; on a worldwide, perpetual, irrevocable, royalty-free basis to BMJ Publishing Group Ltd ("BMJ") its licensees and where the relevant Journal is co-owned by BMJ to the co-owners of the Journal, to publish the Work in this journal and any other BMJ products and to exploit all rights, as set out in our [licence](#).

The Submitting Author accepts and understands that any supply made under these terms is made by BMJ to the Submitting Author unless you are acting as an employee on behalf of your employer or a postgraduate student of an affiliated institution which is paying any applicable article publishing charge ("APC") for Open Access articles. Where the Submitting Author wishes to make the Work available on an Open Access basis (and intends to pay the relevant APC), the terms of reuse of such Open Access shall be governed by a Creative Commons licence – details of these licences and which [Creative Commons](#) licence will apply to this Work are set out in our licence referred to above.

Other than as permitted in any relevant BMJ Author's Self Archiving Policies, I confirm this Work has not been accepted for publication elsewhere, is not being considered for publication elsewhere and does not duplicate material already published. I confirm all authors consent to publication of this Work and authorise the granting of this licence.

## TITLE PAGE

### Title

Caregiver experiences when navigating childhood immunisation in urban communities in Sierra Leone

### Authors

Mohamed F. Jalloh<sup>1</sup>, Palak Patel<sup>1,2</sup>, Roberta Sutton<sup>3</sup>, Shibani Kulkarni<sup>1,2</sup>, Mame Toure<sup>4</sup>, Kerrie Wiley<sup>5</sup>, Tom Sesay,<sup>6</sup> Maria Lahuerta<sup>3,7</sup>, Sierra Leone Urban Immunisation Needs Assessment Group

### Affiliations

1. Immunisation Systems Branch, Global Immunisation Division, Centres for Disease Control and Prevention, Atlanta, Georgia, USA
2. Oak Ridge Institute for Science and Education's Research Participation Program, Centres for Disease Control and Prevention, Atlanta, Georgia, USA
3. ICAP at Columbia University, Mailman School of Public Health, New York, New York, USA
4. ICAP at Columbia University, Sierra Leone Country Office, Freetown, Sierra Leone
5. School of Public Health, The University of Sydney, Sydney, NSW, Australia
6. Child Health Programme, Ministry of Health and Sanitation, Freetown, Sierra Leone
7. Department of Epidemiology, Mailman School of Public Health, New York, New York, USA

### Corresponding author

Mohamed F. Jalloh, PhD, MPH

Immunisation systems Branch, Global Immunisation Division, U.S. Centres for Disease Control and Prevention, Atlanta, Georgia, USA. Email: [yum8@cdc.gov](mailto:yum8@cdc.gov). Tel: +1 (404) 401-2773.

### Wordcount

Abstract: 275 words; Manuscript: 4917 words

### Keywords

Vaccination, immunisation, vaccine, hesitancy, demand, caregiver, experience, qualitative, methodology, interpretative phenomenology, urban, slum, Sierra Leone

## ABSTRACT

**Objective:** To gain in-depth understanding of the caregiver experience when navigating urban immunisation services for their children.

**Design:** An exploratory qualitative assessment comprising 16 in-depth interviews using an interpretative phenomenology approach.

**Setting:** Caregivers were purposively recruited from slums (n=8) and other urban communities (n=8) in the capital city of Sierra Leone.

**Participants:** Caregivers of children ages 6 to 36 months old who were fully vaccinated (n=8) or under-vaccinated (n=8).

**Results:** Vaccination intention was motivated by a feeling of moral duty to 'do the right thing' for the child. In one instance, wanting to do the right thing also resulted in an active refusal of vaccination when a caregiver linked vaccination to the death of a prior child. Caregivers with vaccinated children expected that their 'strong and healthy' children would be able to take care of them later in life and believed that this can be facilitated through vaccination. Trusted information exchange and social support coupled with positive clinic experiences facilitated timely vaccination. However, vaccination was constantly hindered by myriad practical constraints that were compounded by negative clinic experiences. Although childhood immunisation is free-of-charge according to national policy, some caregivers willingly gave money to health workers as a token of appreciation while others begrudgingly did so as a perceived condition to receive good quality service. Caregivers desired more convenient and positive clinic experiences and deeper community engagement.

**Conclusions:** Health system interventions, community engagement, and vaccination outreach need to be tailored to for urban settings. Vaccine communication efforts may resonate more strongly with caregivers when vaccination is framed both around parental responsibilities to do the right thing for the child and the future benefits to the parent.

## STRENGTHS AND LIMITATIONS OF THIS STUDY

- This qualitative assessment sheds light on the complexities surrounding caregivers' experiences when navigating childhood immunisation services in urban poor settings and provides insights for improving immunisation outcomes.
- Theoretical guidance from interpretative phenomenology enhanced the assessment design, data analysis, and interpretation of the results.
- Caregivers of fully vaccinated and under-vaccinated children were purposively recruited to help understand how the two outcomes may be shaped by differences in the caregiver experience.
- The sample only comprised one caregiver with a child that had experienced a serious vaccine side effect, which limits having a rich understanding of such experience among caregivers and the potential linkages to future vaccination refusal.
- Only one caregiver had a zero-dose child that had not received any vaccines in the immunisation schedule. Future sampling strategies may therefore need to be more purposively adapted to also focus on understanding the phenomenon of zero-dose children in urban poor settings.

## MANUSCRIPT

**1. Introduction**

There have been efforts to understand urban immunisation challenges in low- and middle-income countries (LMICs), including in urban slums and informal settlements.<sup>1</sup> Assessment of immunisation barriers in urban areas in LMICs identified a range of practical and social issues, such as population mobility, inaccurate denominators of children due to out-of-date population estimates and poorly defined geographic catchment areas, the lack of trust in the health system among vulnerable groups, overburdened health facilities, and weak community engagement and outreach.<sup>2</sup>

In Sierra Leone, the 2014-2016 Ebola epidemic disrupted the delivery of essential health services, including immunisation services, especially in urban areas.<sup>3,4</sup> Barriers that affected routine health services included the fear of contracting Ebola in health facilities, stigmatization of health workers, and shifting of resources to the epidemic.<sup>5</sup> As the Ebola epidemic waned, measles outbreaks became more frequent due to the decline in vaccination.<sup>6</sup> In the aftermath of the Ebola epidemic, the Government of Sierra Leone and its partners made major investments to rebuild health systems and restore public confidence in the health system.<sup>7,8</sup> However, challenges in access to and the uptake of immunisation services persist, including in urban areas.<sup>9</sup>

The United Nations Children's Fund (UNICEF) and partners developed the Caregiver Journey Framework to guide countries in understanding the experiences, processes, and structures that shape how caregivers seek and receive health services for their children, including essential immunisation.<sup>10</sup> In 2018, we operationalized the Caregiver Journey Framework through a qualitative approach in the Western Area Urban district (WAU) in Sierra Leone. We sought to understand the lived experiences of caregivers of vaccine-eligible children as they navigate urban immunisation services in Sierra Leone.

**2. Methods**

We aimed to understand how household dynamics, social factors, and formal healthcare delivery systems influence childhood immunisation uptake via the lens of primary caregivers of vaccine-eligible children in urban settings in Sierra Leone. Hence, we developed the Immunisation Caregiver Journey Interviews (ICJI) approach<sup>11</sup> based on the Caregiver Journey Framework using principles of interpretative

phenomenology,<sup>12 13</sup> which focuses on elucidating the essence of common experiences to explain, interpret, and make sense of a phenomenon.<sup>14</sup> We used a phenomenological approach to explore the lifeworld of caregivers in how they navigate childhood immunisation for their children repeatedly in low-resource, urban settings.<sup>11</sup> A semi-structured ICJI guide was used to explore the following domains: Decision-making and preparation, making the journey, experiences during vaccination visit, post-vaccination experiences, intentions to return, and perceptions of immunisation promotion activities in the community.

## 2.1. Setting

The WAU district in Sierra Leone comprises most of the capital city of Freetown with approximately 1.2 million inhabitants.<sup>15</sup> The district was heavily affected by the Ebola epidemic, partly due to high population movements and crowded housing conditions.<sup>16</sup> On average, there is less than one medical doctor per 10,000 population.<sup>17</sup> The Government of Sierra Leone introduced the Free Health Care Initiative in 2010 to remove cost barriers for essential health services for pregnant and lactating mothers and under-five children.<sup>18</sup> Childhood immunisation services are delivered through the Expanded Program on Immunisation using fixed sites that are supplemented by community outreach services to be conducted five times monthly.<sup>19</sup> Each catchment community has 10 community health workers (CHWs) who support the promotion of health services on a voluntary basis.<sup>20</sup> A coverage survey in 2019 estimated 86% coverage for three doses of diphtheria-pertussis-tetanus (DPT) vaccine in slums and 92% coverage in non-slum urban areas (92%) in the WAU district. However, coverage of the second dose of measles-containing vaccine was very low in the district (33% in slums and 29% in non-slum urban areas).<sup>9</sup>

## 2.2. Sampling and data collection

The sample size for this qualitative assessment was determined based on an approach that focuses on *qualitative information power* considering the study's aim, sample specificity, application of established theory, quality of dialogue, and analysis strategy.<sup>21</sup> In using interpretive phenomenology as the theoretical basis, we set out a study aim that focused on immunisation-related experiences among a well-defined sample of caregivers of vaccine eligible children. We anticipated that caregivers would provide rich narratives that offer in-depth insights into their experiences. With these considerations in mind, we purposively recruited a total 16 primary caregivers from eight communities in the WAU district, four of which were slums and four were other urban areas in the district to maximize variation in the sample. Within each community, two caregivers of children ages 6-36 months were purposively selected to capture a breadth of caregiver experiences—one whose child was fully vaccinated for age and another whose child had missed at least one scheduled vaccination visit. CHWs supported data collection teams in



1  
2  
3 visiting households to identify and recruit eligible caregivers in the selected communities. The data  
4 collection teams were accompanied by local CHWs in visiting an initial set of households in the  
5 community. Snowball sampling was then used to identify additional households with potentially eligible  
6 children whereby previously visited households pointed data collectors to other households with  
7 potentially eligible children. Data collectors visited such households to screen for eligibility. This process  
8 continued until two caregivers of eligible children were successfully recruited and interviewed from a  
9 particular community. Interviews were conducted on the same of day of recruitment after obtaining  
10 informed consent from the caregiver.  
11  
12  
13  
14  
15

16  
17 We recruited data collectors (interviewers and notetakers) who were fluent in English and the  
18 predominant local language in the WAU district (Krio). The data collectors had post-secondary  
19 educational training in social sciences and were experienced in conducting qualitative data collection in  
20 Sierra Leone. Two behavioural scientists trained the facilitators for a week on the assessment protocol.  
21 One of the trainers was from Sierra Leone and had experience conducting social science research in Sierra  
22 Leone. During the training, the English version of the guide was translated into Krio by locally hired staff  
23 together with the facilitators and trainer. The data collectors were trained on how to probe on the spot to  
24 obtain additional pertinent information from caregivers. Data collection occurred in August–September  
25 2018. All interviews were audio-recorded with permission from participants; they were then transcribed  
26 and translated into English by the local team. Interviews lasted about an hour on average and were  
27 conducted in the vicinity of the homes of the caregivers. Data collection teams were trained on choosing  
28 suitable interview locations to enable caregivers to speak freely. The facilitators conducted debriefing  
29 sessions immediately after each interview to make note of key experiences and observations. We have  
30 previously documented practical lessons learned from implementing the assessment in Sierra Leone.<sup>11</sup>  
31  
32  
33  
34  
35  
36  
37  
38  
39  
40

### 41 **2.3. Data analysis**

42 We analysed the data using a combination of theoretical guidance from interpretative qualitative inquiry  
43 (IPA)<sup>22</sup> with non-theoretical aspects of qualitative content analysis for inductive coding of meaning units  
44 and categorization of codes in latent constructs.<sup>23</sup> Two analysts (one male, one female) read all transcripts  
45 and created analytic memos and then analysed the transcripts using both within-case and cross-case  
46 analysis. In the within-case analysis, we developed a narrative profile for each caregiver to bring key  
47 aspects of their lived experiences to the foreground—consistent with the IPA approach in qualitative  
48 research. In the initial part of the cross-case analysis, each analyst coded three different transcripts (six  
49 total), using an inductive approach to identify and interpret meaning units within the text. To gain  
50 alternative interpretations of the coded meaning units, three of the coded transcripts were shared with a  
51  
52  
53  
54  
55  
56  
57

1  
2  
3 third qualitative expert, who was not involved in the previous stages of the assessment, for independent  
4 'blind' coding of the transcripts. Feedback from the third analyst was discussed by the two primary  
5 analysts and incorporated into the coding scheme. The analysts used an iterative process to review their  
6 codes, discuss their interpretations of the manifest content, and harmonize the initial set of codes that  
7 were used for coding the remaining manuscripts. NVivo software (QSR International–2018, Version 12)  
8 was used for the final organization and coding of the transcripts. Using a consultative process between the  
9 two analysts, manifest categories of meaning units were grouped to reflect latent content that was later  
10 developed into cross-cutting themes. Throughout the process, the analysts exercised reflexivity regarding  
11 subjective interpretations and iteratively re-examined the transcripts to identify alternative interpretations  
12 until consensus was reached.  
13  
14  
15  
16  
17  
18  
19

## 20 **2.4. Ethical approval**

21 The assessment was approved by the Sierra Leone Ethics and Scientific Review Committee (SLESRC-  
22 17052018), Columbia University Medical Centre Institutional Review Board (IRB-AAAR9031), and the  
23 Centre for Global Health at the U.S. Centres for Disease Control and Prevention (CGH-2018-184). All  
24 participants provided written informed consent.  
25  
26  
27  
28  
29

## 30 **2.5. Patient and public involvement**

31 No patient involved.  
32  
33  
34  
35

## 36 **3. Results**

37 At the time of the interviews, half of the children had missed at least one scheduled vaccine dose. Four  
38 themes emerged from the interviews: Caregivers felt morally obligated to vaccinate their children because  
39 of the anticipated benefits (Table 1); vaccination was facilitated by trusted information exchange and  
40 social support, coupled with positive clinic experiences (Table 2); vaccination was hindered by practical  
41 constraints compounded by negative experiences linked to unfavourable health worker practices and  
42 adverse events following immunisation (Table 3); and lastly, caregivers desired stronger community  
43 engagement and better experiences at the vaccination clinic (Table 4). There were no notable differences  
44 in themes between slums and other urban communities.  
45  
46  
47  
48  
49  
50

### 51 **3.1. Theme 1. Caregivers felt morally obligated to vaccinate their children and anticipated** 52 **benefits to the child and the parent (Table 1)** 53 54 55 56 57

### 3.1.1. Obligation to the child

Caregivers felt morally obligated to get their children vaccinated. In essence, vaccination was viewed as ‘doing the right thing’ for the child. Even caregivers who had missed scheduled vaccination felt a responsibility to try to get the child vaccinated.

*“It is my duty to take my baby to the hospital for immunisation. It is my responsibility as [a] mother to ensure that my baby completes the rounds of immunisation without defaulting.”* –

Caregiver whose child had missed a scheduled vaccination

### 3.1.2. Wanting a ‘strong and healthy baby’

Caregivers consistently expressed that immunisation has important health benefits to the child, and that missing scheduled vaccination would ‘risk the baby’s life.’ In addition, they valued having a ‘strong and healthy baby’ and felt that completing the vaccination schedule will positively impact the baby’s health.

*“I think [the] vaccine is good for our children. It is important and it helps to build their immune system to keep them strong and healthy; it fights against many things in the body...”* – Caregiver whose child was fully vaccinated

### 3.1.3. Future benefits of vaccination for the parent

The notion that vaccinated children will be able to take care of the parent later in life emerged as a dimension of vaccination benefit to the parent.

*“It is very difficult for me to be absent for immunisation or not to take my baby to the hospital when sick. Sometimes people think I’m mad but I’m not. I’m trying to bring up my children in a way that they will benefit me when I’m old.”* – Caregiver whose child had missed a scheduled vaccination

## 3.2. Theme 2. Vaccination was facilitated by trusted information exchange and social support, coupled with positive clinic experiences (Table 2)

### 3.2.1. Diversity of immunisation reminders

Caregivers were exposed to numerous reminders and cues to vaccinate their children, including information gleaned from the immunisation cards, health workers, community campaigns, and family members. However, the child’s immunisation card stood out as the most important reminder that caregivers and families relied on to remember the dates of the scheduled vaccination visits.

1  
2  
3 *“I do remind myself because they [health workers] will write at the back of the immunisation*  
4 *card the date for the next visit. The immunisation card will tell you the date for the next visit. –*  
5 *Caregiver whose child had missed a scheduled vaccination*  
6  
7

8  
9 In addition, community outreach campaigns and announcements in the community were also viewed as  
10 helpful reminders to vaccinate.  
11

12 *“The health workers in this community and the CHWs are doing well as they do go round telling*  
13 *people not to forget to take their babies to the hospital for immunisation.” – Caregiver whose*  
14 *child had missed a scheduled vaccination*  
15  
16  
17

### 18 19 **3.2.2. Information access and trust**

20 Immunisation information sources varied, but health workers were consistently cited as trusted sources of  
21 information. Nurses were more trusted than lay CHWs because nurses were viewed as more  
22 knowledgeable. While waiting in line before immunisation services, caregivers appreciated the ‘health  
23 talk’ they received from nurses who advised on health and immunisation.  
24

25 *“I trust them [nurses] because they are a team of qualified nurses ... Before they come here, they*  
26 *know everything about the vaccines and any implications of the vaccines. They are able to*  
27 *explain more than the CHWs and other community workers in the area. The nurses will tell you*  
28 *more. There are things that the community workers do not know, and they refer you to the*  
29 *nurses.” – Caregiver whose child was fully vaccinated*  
30  
31  
32  
33  
34  
35

### 36 37 **3.2.3. Getting fathers more involved**

38 Fathers were rarely involved in taking their children to the vaccination clinic. We uncovered only two  
39 instances when fathers were actively involved. In those instances, the mothers felt supported, and their  
40 children were fully vaccinated. In one situation, a father that routinely accompanied the child to the  
41 vaccination clinic was celebrated by health workers and given the ‘best father’ award.  
42

43 *“There was [a] time when he [my husband] was given the best father award [at the clinic]*  
44 *because he is always with me at the hospital. That is the name I have also given to my husband.*  
45 *Even when the baby is crying, I will say ‘best father’ take your baby.” – Caregiver whose child*  
46 *was fully vaccinated*  
47  
48  
49  
50  
51

### 52 53 **3.2.4. Positive experiences with health workers**

54 Positive experiences with health workers during vaccination visits encouraged caregivers to vaccinate  
55 their children. Positive experiences included a cordial relationship with the nurses and health workers.  
56  
57

1  
2  
3 They expressed that nurses took good care of their children, made them feel comfortable, and tried to  
4 build a good rapport. Some caregivers said they would voluntarily give small amounts of money to health  
5 workers as a token of their appreciation after vaccinating the child.  
6

7  
8 *“...the nurses do encourage you and will make jokes so that you will laugh at the end of the day.*  
9 *There is a lot of fun [interactions], which made some of us forget about our stresses.” –*  
10  
11 Caregiver whose child was fully vaccinated  
12  
13

### 14 **3.2.5. Post-vaccination information sharing**

15  
16 Upon returning home from the vaccination visit, caregivers often discussed the clinic experience with  
17 their spouses, families, and other caregivers in the community. In addition to information obtained from  
18 health workers at the clinic, caregivers also sought advice from other ‘more experienced’ caregivers in the  
19 community.  
20  
21

22 *“Most times after immunisation, my baby will run a temperature, but the health workers always*  
23 *provide drugs to counter the fever. We have caregivers in this community with vast knowledge*  
24 *and since this is my first baby, I love to talk to them so that we can share our experiences which*  
25 *will be of advantage to me as I’m very new in the field [of parenting].” –Caregiver whose child*  
26 *was fully vaccinated*  
27  
28  
29  
30

## 31 **3.3. Theme 3. Vaccination was hindered by practical constraints compounded by negative** 32 **experiences linked to unfavourable health worker practices and adverse events** 33 **following immunisation (Table 3)** 34 35 36 37

### 38 **3.3.1. Preparing for the journey and getting to the clinic**

39  
40 Caregivers commonly cited the need to juggle ‘household duties’ and other activities when planning the  
41 visit as a barrier, especially in the absence of fathers’ involvement in taking the child to the clinic. In  
42 addition, mothers frequently depended on their children’s fathers for financial support to cover the  
43 expenses related to the vaccination clinic visit. Some caregivers recounted needing to travel long  
44 distances to get to the vaccination clinic, which in some instances, took up to an hour on foot.  
45  
46  
47  
48

### 49 **3.3.2. Inconveniences at the clinic**

50  
51 Caregivers anticipated various inconveniences at the vaccination visit. The prolonged time spent waiting  
52 for the child to be vaccinated emerged as a major inconvenience, which was more pronounced when  
53 seeking immunisation services at large health facilities, such as hospitals. Anticipating the long wait,  
54 caregivers usually tried to arrive early at the vaccination site with the hopes of getting seen first. The  
55  
56  
57

1  
2  
3 vaccination visit was reportedly prolonged due to the range of activities involved with the child health  
4 visit including weighing the baby as part of growth monitoring and other health checks.  
5

6 *“It is painful if you waste much time at the health facility because you have other issues to attend*  
7 *to. To avoid that, that is why I always come early to the health facility.”* – Caregiver whose child  
8 was fully vaccinated  
9  
10

### 11 **3.3.3. Dissatisfaction with specific practices at the clinic**

12 Caregivers complained about some of their experiences and interactions with health care workers during  
13 the vaccination visit. A key complaint was that health workers shout at caregivers and sometimes used  
14 vulgar language toward caregivers. In other instances, there were complaints that some health workers  
15 habitually arrive late to the vaccination session, which further prolonged the time caregivers spent  
16 waiting. In addition, systemically hidden costs generated substantial dissatisfaction. Caregivers said that  
17 they needed to “shake hands” with health workers at different times of the visit (e.g., first time registering  
18 the child to get a card, before entering the facility, and before weighing the baby). Shaking hands implied  
19 giving some money during the handshake. Money was used to ‘fast-track’ the child’s vaccination.  
20  
21

22 *“Sometimes if I don’t want to spend much time at the hospital, I will shake the hand of the nurse*  
23 *so that they can fast track the immunisation of my baby. I will give them something like two*  
24 *thousand Leones or whatever I have with me at that moment... Health is wealth and they [health*  
25 *workers] don’t need us but we do [need them]. The money we give is nothing compared to the*  
26 *health of our children... At the end of the day, we will grumble on our way home as the services*  
27 *are supposed to be free for our children, yet we are paying for it. The health workers are really*  
28 *trying, but the idea for them to take money from us is bad. And if you don’t give them money, they*  
29 *will talk to you carelessly.”* – Caregiver whose child was fully vaccinated  
30  
31  
32  
33  
34  
35  
36  
37  
38  
39  
40

41 Money was also demanded as a form of ‘punishment’ to caregivers who missed their children’s scheduled  
42 vaccination date.  
43

44 *“If you failed to take your baby to the hospital on [the] stipulated date, you will definitely have to*  
45 *pay some amount at the end of the day in the form of punishment. You must pay five thousand or*  
46 *more.”* – Caregiver whose child was fully vaccinated  
47  
48  
49

### 50 **3.3.4. Adverse events following immunisation**

51 Caregivers cited numerous instances when their children experienced vaccine side effects such as ‘fever,’  
52 ‘swelling at the injection site,’ and the ‘baby becoming lethargic.’ Fever was the most common side  
53 effect, and the caregivers knew to administer fever-reducing medication as instructed by health workers.  
54  
55  
56  
57

1  
2  
3 When there was swelling at the injection site, a common practice among caregivers was to massage the  
4 swollen area, sometimes with an onion or a bar of soap in their effort to try to reduce the swelling.

5  
6 *“Sometimes my baby’s leg becomes swollen... because some nurses are heavy-handed, and I meet*  
7 *several nurses when I visit the hospital. Sometimes the leg gets swollen, and they treat him. I have*  
8 *to rub the leg to avoid swelling... I use soap to rub off the swelling and I give Panadol to stop the*  
9 *fever... some people say you should not allow every nurse to administer [an]injection to the child.*  
10 *I should have a permanent nurse that gives injection to my child without swelling.” – Caregiver*  
11 *whose child missed a scheduled vaccination*  
12  
13  
14  
15

16  
17 In one rare situation, a caregiver had a prior child who experienced fever, convulsed, and died a few days  
18 after getting vaccinated. Therefore, the caregiver decided to not vaccinate subsequent children.

19  
20 *“After the immunisation, my baby started running temperature, I administered paracetamol as I*  
21 *was told by the health workers. The baby convulsed and that was the end of that baby. I don’t*  
22 *want a repeat of that in my life. I have therefore decided not to take my babies for immunisation*  
23 *anymore” – Caregiver whose child missed a scheduled vaccination*  
24  
25  
26  
27

28 Besides passive acceptance of the BCG vaccine at the birth of the youngest child, this same caregiver  
29 actively refused all other vaccines despite encouragement by a family member to vaccinate the child.

30  
31 *“I’m not outrightly saying it was as a result of the immunisation [that my child died]; as every*  
32 *death is the work of God. But from what I have gathered so far, I have personally decided not to*  
33 *take my baby to the health facility to be immunized. It is not that I’m tired of going to the health*  
34 *facility or because of the distance or money. I do get a lot of pressure from my aunt to take my*  
35 *baby to the health facility for immunisation, but the thing is that I just don’t trust the system and*  
36 *what immunisation does. – Caregiver whose child missed a scheduled vaccination*  
37  
38  
39  
40  
41

42 From the perspective of this same caregiver, the vaccinated child died but the unvaccinated children  
43 survived and thrived, which was cited as a reason for refusing vaccination.

44  
45 *“I believe in exclusive breastfeeding, sometimes for two years and a half and sometimes [only]*  
46 *two years. My baby is now two years seven months old and doing well like any of those children*  
47 *that are on immunisation or have completed...Just as I was saying, sometimes my heart will tell*  
48 *me to take the baby for immunisation but after thinking of the past experience, I would decide not*  
49 *to. I’m now used to that... The simple fact here is that, since the other children are doing well*  
50 *without immunisation, I will not take [the baby] to the health facility for immunisation and that is*  
51 *all.” – Caregiver whose child missed a scheduled vaccination*  
52  
53  
54  
55  
56  
57

### 3.4. Theme 4: Caregivers desired stronger community engagement and better experiences at the vaccination clinic (Table 4)

Implementing community outreach campaigns for immunisation at regular intervals with a focus on defaulters was recommended by participants to improve vaccination outcomes. In addition, caregivers wanted health workers and community leaders to be involved in immunisation promotion along with the CHWs. They wanted the vaccination clinic experience to improve and become more conducive to caregivers, including shorter wait time at the clinic and more positive interactions with health workers. Lastly, caregivers wanted health workers to stop demanding money from them, though they may not mind giving money as a token of appreciation when they could afford it.

*“In addition, you should engage the Chiefs, because in each area we have Chiefs to spread out this message. You could educate them so that they in turn can educate those in the community. Let us have Town Criers go around disseminating the messages. It would be nice for them to allocate people in the health centre who move from house to house to educate the breastfeeding mothers because some of us are stubborn to come onboard.”* – Caregiver whose child was fully vaccinated

## 4. Discussion

Our qualitative analysis highlighted several important themes. In the backdrop of anticipated benefits to both the child and parent, vaccination intention was motivated by a feeling of moral duty to ‘do the right thing.’ Timely and trusted exchange of information together with social support and positive experiences at the vaccination clinic were important facilitators of vaccination. In contrast, vaccination was discouraged by negative interactions with health workers at the clinic, the occurrence and fear of vaccine side effects, multitude of ‘hidden’ costs, juggling vaccination with other responsibilities, and inconveniences, such as long traveling time to the clinic and long delays at the clinic. Nevertheless, caregivers were resilient in devising ways to try to get their children vaccinated. Lastly, caregivers wanted the vaccination experience to improve, and they desired stronger community engagement to help optimize vaccination outcomes. However, systemic issues, such as informal payments, overcrowding in health facilities, and the reported overburdened health workers may require interventions at the health systems level. These themes from Sierra Leone provide in-depth insights regarding the motivations, facilitators, and barriers of vaccination in an urban LMIC setting.



1  
2  
3 Moral values may shape vaccination attitudes.<sup>24</sup> Philosophical arguments regarding the morality of  
4 vaccination have been heavily debated.<sup>25-28</sup> Caregivers in our sample largely viewed vaccination via a  
5 moral lens encompassing parental duty to do the right thing for the child. In one situation, however, we  
6 found that the desire to ‘do the right thing’ can also translate into vaccination refusal in the backdrop of  
7 other past refusals, observing ‘healthy unvaccinated’ children, and having distrust of the health system.  
8 Quantitative research from high-income countries has shown that parents with unvaccinated children were  
9 more likely to perceive their children to be at low risk of vaccine-preventable diseases and were more  
10 likely to perceive low vaccine effectiveness and safety compared to parents with vaccinated children.<sup>29</sup>  
11 Our findings suggest that childhood immunisation communication efforts may resonate more strongly  
12 with caregivers when vaccination is framed around parental responsibilities to do the right thing for the  
13 child and the anticipated future benefits to parents.  
14  
15  
16  
17  
18  
19  
20  
21

22 Across the interviews, there was an apparent tension in the relationship between caregivers and health  
23 workers. Caregivers often expressed their appreciation of health workers and empathized with the  
24 challenging context in which they do their work. Health workers were strongly viewed as authoritative  
25 sources of trusted information regarding immunisation and the child’s health, which is consistent with  
26 findings from high-income countries<sup>30-32</sup> and LMICs.<sup>33 34</sup> Our findings on the role of monetary exchange  
27 in vaccination exemplify the complex relationship between caregivers and health workers in low-resource  
28 urban communities in Sierra Leone. Some caregivers voluntarily gave money to health workers as a  
29 ‘token of appreciation’ while others begrudgingly gave money because they viewed it as a condition for  
30 receiving good quality service from health workers. Interventions at the health systems level are  
31 necessary to help discourage informal payments to health workers—a practice that may perpetuate  
32 vaccination inequities among poor caregivers who are unable to meet monetary expectations.  
33  
34  
35  
36  
37  
38  
39  
40

41 Our findings also illuminate the need for interventions at the household and family level. We uncovered  
42 that fathers were rarely involved in taking their children to the vaccination clinic but were often engaged  
43 in the decision-making processes. In the few instances when fathers were involved in taking their children  
44 to the clinic, the mothers felt supported, and their children were fully vaccinated. A study in Nigeria  
45 found that paternal involvement in immunisation was greater in rural settings compared to urban  
46 settings.<sup>35</sup> In urban areas, the same study found that paternal involvement was greater among educated  
47 fathers compared to uneducated fathers. In a separate study in Ghana, the involvement of educated fathers  
48 in the vaccination decision was associated with timelier vaccination uptake compared to the involvement  
49 of uneducated fathers in the decision.<sup>36</sup> More broadly, shifting from a mother-child dyad to a family triad  
50 in the care of children has proven to have positive effects on paediatric health outcomes across diverse  
51  
52  
53  
54  
55  
56  
57

1  
2  
3 contexts.<sup>37</sup> Additional assessments and interventions are needed to explore and evaluate culturally  
4 appropriate ways to enhance the involvement of fathers in childhood immunisation in Sierra Leone and  
5 other similar LMIC settings.  
6  
7

8  
9 Existing evidence suggests that vaccine safety concerns, often linked to adverse events following  
10 immunisation (AEFI), contribute to vaccine hesitancy.<sup>38 39</sup> Serious AEFIs may be ‘triggering events’ for  
11 derailing vaccine confidence and prompting active refusal among certain caregivers and their  
12 communities—especially when the serious AEFI is perceived to be linked to the vaccine or the  
13 vaccination process.<sup>40</sup> Together with prior evidence, these findings emphasize the need for robust AEFI  
14 surveillance and investigations<sup>41</sup> to identify, counsel, and follow-up with caregivers whose children  
15 experience AEFI, and therefore, are potentially at risk of missing subsequent vaccination. Health workers  
16 and CHWs may benefit from periodic in-service training on how to effectively communicate vaccine  
17 safety and address concerns about AEFIs.<sup>42</sup>  
18  
19  
20  
21  
22  
23  
24

#### 25 **4.1. Limitations**

26 There were several limitations to our assessment. First, it is possible that some nuanced meaning may  
27 have been lost when translating the audio recordings from Krio to English. Second, we only identified one  
28 caregiver who routinely and actively refused all vaccines for her child after experiencing a serious AEFI,  
29 which may reflect the overall rarity of zero-dose unvaccinated children in Sierra Leone (approximately  
30 3%).<sup>43</sup> This was the only caregiver with a child that experienced a serious AEFI in our sample, which  
31 limits our ability to have a rich understanding of such experience among caregivers more broadly and the  
32 potential linkages to vaccination refusal. Although such experiences of serious AEFI are rare, they may  
33 have the tendency to get publicized in the community, which may negatively influence vaccination  
34 decisions among other caregivers. Taken together, our results call for additional qualitative assessments to  
35 get a deeper understanding of vaccination refusal within the Sierra Leonean context and other low-  
36 resource LMIC settings. Sampling strategies may therefore need to be adapted accordingly to focus on  
37 caregivers who actively refuse vaccination for their children. Lastly, our findings reflected gender  
38 dimensions that may be based on sociocultural norms in Sierra Leonean society but may also be due to  
39 sampling bias because the caregivers we conveniently recruited were mostly stay-at-home mothers.  
40  
41  
42  
43  
44  
45  
46  
47  
48  
49

#### 50 **5. Conclusions**

51 As the COVID-19 pandemic disrupts childhood immunisation globally,<sup>44</sup> especially in LMICs, our  
52 assessment provides a foundational understanding of the challenges that caregivers encounter in urban  
53 settings in Sierra Leone. It also sheds light on opportunities to improve vaccination outcomes in urban  
54  
55  
56  
57

1  
2  
3 poor settings, which is a global immunisation priority. The findings show that health system  
4 interventions, community engagement, and vaccination outreach may need to be tailored to for urban  
5 settings. Vaccine communication efforts may resonate more strongly with caregivers when vaccination is  
6 framed both around parental responsibilities to do the right thing for the child and the future benefits to  
7 the parent.  
8  
9  
10

### 11 12 13 14 **Competing interests**

15 None declared.  
16  
17

### 18 19 **Data availability**

20 All data relevant to the study are included in the article or uploaded as supplementary information.  
21  
22

### 23 24 **Contributors**

25 MFJ, RS, MT, TS, and ML designed the assessment. MFJ, PP, SK, and KW analysed the data. MJF, PK,  
26 RS, SK, MT, KW, TS, and ML contributed to the interpretation of the results. MFJ, PP and SK drafted  
27 the manuscript. RS, MT, KW, TS, and ML contributed to revising the manuscript. All authors reviewed  
28 and approved the final manuscript.  
29  
30  
31

### 32 33 34 **Acknowledgements**

35 We thank the 16 caregivers who participated in the in-depth interviews.  
36  
37

### 38 39 **Funding**

40 U.S. Centers for Disease Control and Prevention (U19GGH001581).  
41  
42

### 43 44 **Disclaimer**

45 The findings and conclusions in this paper are those of the authors and do not necessarily represent the  
46 official position of the US Centres for Disease Control and Prevention.  
47  
48  
49  
50  
51  
52  
53  
54  
55  
56  
57

## 6. References

1. Nelson KN, Wallace AS, Sodha SV, et al. Assessing strategies for increasing urban routine immunisation coverage of childhood vaccines in low and middle-income countries: A systematic review of peer-reviewed literature. *Vaccine* 2016;34(46):5495-503. doi: 10.1016/j.vaccine.2016.09.038
2. JSI. Strengthening Immunisation for the Urban Poor: Experiences and Lessons Learned from Five Country Studies, 2018. Available from: <https://www.jsi.com/resource/strengthening-immunisation-for-the-urban-poor-experiences-and-lessons-learned-from-five-country-studies/> [accessed November 12 2020].
3. Brolin Ribacke KJ, Saulnier DD, Eriksson A, et al. Effects of the West Africa Ebola Virus Disease on Health-Care Utilization - A Systematic Review. *Frontiers in public health* 2016;4:222. doi: 10.3389/fpubh.2016.00222
4. Elston JW, Cartwright C, Ndumbi P, et al. The health impact of the 2014-15 Ebola outbreak. *Public health* 2017;143:60-70. doi: 10.1016/j.puhe.2016.10.020
5. Yerger P, Jalloh M, Coltart CEM, et al. Barriers to maternal health services during the Ebola outbreak in three West African countries: a literature review. *BMJ Glob Health* 2020;5(9) doi: 10.1136/bmjgh-2020-002974
6. Masresha BG, Luce R, Jr., Weldegebriel G, et al. The impact of a prolonged ebola outbreak on measles elimination activities in Guinea, Liberia and Sierra Leone, 2014-2015. *Pan Afr Med J* 2020;35(Suppl 1):8. doi: 10.11604/pamj.suppl.2020.35.1.19059
7. Government of Sierra Leone. National Ebola Recovery Strategy for Sierra Leone 2015 [Available from: [https://ebolaresponse.un.org/sites/default/files/sierra\\_leone\\_-\\_national\\_recovery\\_strategy\\_2015-2017.pdf](https://ebolaresponse.un.org/sites/default/files/sierra_leone_-_national_recovery_strategy_2015-2017.pdf) accessed December 5 2020].
8. U.S. Centers for Disease Control and Prevention. Global Health – Sierra Leone, 2019. Available from: <https://www.cdc.gov/globalhealth/countries/sierra-leone/default.htm> [accessed December 5 2020].
9. Feldstein LR, Sutton R, Jalloh MF, et al. Access, demand, and utilization of childhood immunisation services: A cross-sectional household survey in Western Area Urban district, Sierra Leone, 2019. *Journal of global health* 2020;10(1):010420. doi: 10.7189/jogh.10.010420
10. UNICEF. Human Centered Design 4 Health, 2018. Available from: <https://www.hcd4health.org/> [accessed November 18 2020].
11. Jalloh MF, Kinsman J, Conteh J, et al. Barriers and facilitators to reporting deaths following Ebola surveillance in Sierra Leone: implications for sustainable mortality surveillance based on an exploratory qualitative assessment. *BMJ Open* 2021;11(5):e042976. doi: 10.1136/bmjopen-2020-042976
12. Diekelmann NL. Learning-as-testing: a Heideggerian hermeneutical analysis of the lived experiences of students and teachers in nursing. *ANS Advances in nursing science* 1992;14(3):72-83. doi: 10.1097/00012272-199203000-00010
13. Dreyfus HL. Being-in-the-world: A commentary on Heidegger's Being and Time. Cambridge: The MIT Press 1991.

14. Dahlberg K. The essence of essences – the search for meaning structures in phenomenological analysis of lifeworld phenomena. *International journal of qualitative studies on health and well-being* 2006;1(1):11-19. doi: 10.1080/17482620500478405
15. Statistics Sierra Leone. 2015 Sierra Leone Population and Housing Census. 2016. Available from: <https://www.statistics.sl/index.php/census/census-2015.html> [accessed November 12, 2020]
16. Lamunu M, Olu OO, Bangura J, et al. Epidemiology of Ebola Virus Disease in the Western Area Region of Sierra Leone, 2014-2015. *Frontiers in public health* 2017;5:33. doi: 10.3389/fpubh.2017.00033 [published Online First: 2017/03/18]
17. World Health Organization. Medical doctors per 10,000 population 2021 [Available from: [https://www.who.int/data/gho/data/indicators/indicator-details/GHO/medical-doctors-\(per-10-000-population\)](https://www.who.int/data/gho/data/indicators/indicator-details/GHO/medical-doctors-(per-10-000-population))] [accessed December 5 2021].
18. Witter S, Brikci N, Harris T, et al. The free healthcare initiative in Sierra Leone: Evaluating a health system reform, 2010-2015. *The International journal of health planning and management* 2018;33(2):434-48. doi: 10.1002/hpm.2484
19. Government of Sierra Leone. Comprehensive EPI Multi-Year Plan 2017-2021, 2016. Available from: <https://www.gavi.org/sites/default/files/document/2021/cMYP%20Sierra%20Leone%202017-2021.pdf> [accessed December 5 2020].
20. Government of Sierra Leone. Policy for Community Health Workers in Sierra Leone, 2012. Available from: <https://chwcentral.org/wp-content/uploads/2015/01/CHW-Policy-Sierra-Leone.pdf> [accessed December 5 2020].
21. Malterud K, Siersma VD, Guassora AD. Sample Size in Qualitative Interview Studies: Guided by Information Power. *Qualitative health research* 2016;26(13):1753-60. doi: 10.1177/1049732315617444
22. Smith JA, Flowers P, Larkin M. Interpretative phenomenological analysis: theory, method and research. United States: Sage 2009.
23. Graneheim UH, Lundman B. Qualitative content analysis in nursing research: concepts, procedures and measures to achieve trustworthiness. *Nurse education today* 2004;24(2):105-12. doi: 10.1016/j.nedt.2003.10.001
24. Amin AB, Bednarczyk RA, Ray CE, et al. Association of moral values with vaccine hesitancy. *Nature human behaviour* 2017;1(12):873-80. doi: 10.1038/s41562-017-0256-5
25. Di Pietro ML, Poscia A, Telesman AA, et al. Vaccine hesitancy: parental, professional and public responsibility. *Annali dell'Istituto superiore di sanita* 2017;53(2):157-62. doi: 10.4415/ann\_17\_02\_13
26. Giubilini A, Douglas T, Savulescu J. The moral obligation to be vaccinated: utilitarianism, contractualism, and collective easy rescue. *Medicine, health care, and philosophy* 2018;21(4):547-60. doi: 10.1007/s11019-018-9829-y
27. Bester JC. Measles Vaccination is Best for Children: The Argument for Relying on Herd Immunity Fails. *Journal of bioethical inquiry* 2017;14(3):375-84. doi: 10.1007/s11673-017-9799-4
28. Dawson A. What are the moral obligations of the traveller in relation to vaccination? *Travel medicine and infectious disease* 2007;5(2):90-6. doi: 10.1016/j.tmaid.2006.01.005

- 1  
2  
3  
4 29. Omer SB, Salmon DA, Orenstein WA, et al. Vaccine refusal, mandatory immunisation, and the risks  
5 of vaccine-preventable diseases. *N Engl J Med* 2009;360(19):1981-8. doi: 10.1056/NEJMsa0806477  
6
- 7 30. Frew PM, Chung Y, Fisher AK, et al. Parental experiences with vaccine information statements:  
8 Implications for timing, delivery, and parent-provider immunisation communication. *Vaccine*  
9 2016;34(48):5840-44. doi: 10.1016/j.vaccine.2016.10.026  
10
- 11 31. Drezner D, Youngster M, Klainer H, et al. Maternal vaccinations coverage and reasons for non-  
12 compliance - a cross-sectional observational study. *BMC pregnancy and childbirth* 2020;20(1):541. doi:  
13 10.1186/s12884-020-03243-w  
14
- 15 32. Wiley KE, Massey PD, Cooper SC, et al. Pregnant women's intention to take up a post-partum  
16 pertussis vaccine, and their willingness to take up the vaccine while pregnant: a cross sectional survey.  
17 *Vaccine* 2013;31(37):3972-8. doi: 10.1016/j.vaccine.2013.06.015  
18
- 19 33. Makwe CC, Anorlu RI. Knowledge of and attitude toward human papillomavirus infection and  
20 vaccines among female nurses at a tertiary hospital in Nigeria. *International journal of women's health*  
21 2011;3:313-7. doi: 10.2147/ijwh.S22792  
22
- 23 34. Foss HS, Oldervoll A, Fretheim A, et al. Communication around HPV vaccination for adolescents in  
24 low- and middle-income countries: a systematic scoping overview of systematic reviews. *Systematic*  
25 *reviews* 2019;8(1):190. doi: 10.1186/s13643-019-1100-y  
26
- 27 35. Sodeinde K, Amoran O, Abiodun O, et al. A rural/urban comparison of paternal involvement in  
28 childhood immunisation in Ogun Central Senatorial District, Nigeria. *The Nigerian postgraduate medical*  
29 *journal* 2020;27(4):336-42. doi: 10.4103/npmj.npmj\_101\_20  
30
- 31 36. Brugha RF, Kevany JP, Swan AV. An investigation of the role of fathers in immunisation uptake. *Int*  
32 *J Epidemiol* 1996;25(4):840-5. doi: 10.1093/ije/25.4.840  
33
- 34 37. Allport BS, Johnson S, Aqil A, et al. Promoting Father Involvement for Child and Family Health.  
35 *Acad Pediatr* 2018;18(7):746-53. doi: 10.1016/j.acap.2018.03.011  
36
- 37 38. Dube E, Laberge C, Guay M, et al. Vaccine hesitancy: an overview. *Human vaccines &*  
38 *immunotherapeutics* 2013;9(8):1763-73. doi: 10.4161/hv.24657  
39
- 40 39. Larson HJ, Jarrett C, Eckersberger E, et al. Understanding vaccine hesitancy around vaccines and  
41 vaccination from a global perspective: a systematic review of published literature, 2007-2012. *Vaccine*  
42 2014;32(19):2150-9. doi: 10.1016/j.vaccine.2014.01.081  
43
- 44 40. Du F, Chantler T, Francis MR, et al. The determinants of vaccine hesitancy in China: A cross-  
45 sectional study following the Changchun Changsheng vaccine incident. *Vaccine* 2020;38(47):7464-71.  
46 doi: 10.1016/j.vaccine.2020.09.075  
47
- 48 41. World Health Organization. Adverse events following immunisation (AEFI), 2021. Available from:  
49 [https://www.who.int/immunisation/monitoring\\_surveillance/who-immuniz.pdf](https://www.who.int/immunisation/monitoring_surveillance/who-immuniz.pdf) [accessed February 18  
50 2021].  
51
- 52 42. World Health Organization. Vaccine safety basics e-learning course, 2021. Available from:  
53 <https://vaccine-safety-training.org/simplified-and-key-messages.html> [accessed February 19 2021].  
54

1  
2  
3  
4 43. UNICEF. Sierra Leone Multiple Indicators Cluster Survey, 2017. Available from:  
5 [https://mics.unicef.org/news\\_entries/106/SIERRA-LEONE-2017-MICS-RELEASED](https://mics.unicef.org/news_entries/106/SIERRA-LEONE-2017-MICS-RELEASED) [accessed January  
6 21 2021].  
7

8  
9 44. Abbas K, Procter SR, van Zandvoort K, et al. Routine childhood immunisation during the COVID-19  
10 pandemic in Africa: a benefit-risk analysis of health benefits versus excess risk of SARS-CoV-2  
11 infection. *Lancet Glob Health* 2020;8(10):e1264-e72. doi: 10.1016/s2214-109x(20)30308-9  
12  
13  
14  
15  
16  
17  
18  
19  
20  
21  
22  
23  
24  
25  
26  
27  
28  
29  
30  
31  
32  
33  
34  
35  
36  
37  
38  
39  
40  
41  
42  
43  
44  
45  
46  
47  
48  
49  
50  
51  
52  
53  
54  
55  
56  
57  
58  
59  
60

For peer review only

**Table 1. Thematic area on the motivation to get the child vaccinated—Western Area Urban, Sierra Leone, 2018**

| Meaning unit                                  | Category                | Theme                                                                                                              |
|-----------------------------------------------|-------------------------|--------------------------------------------------------------------------------------------------------------------|
| Responsibility to ensure full vaccination     | Obligation to the child | Caregivers felt morally obligated to vaccinate their children and anticipated benefits to the child and the parent |
| Obligation to do the right thing              |                         |                                                                                                                    |
| Immunisation as a requirement                 |                         |                                                                                                                    |
| Immunisation is important for baby's health   | Anticipated benefits    |                                                                                                                    |
| Wanting 'strong baby'                         |                         |                                                                                                                    |
| 'Health is wealth'                            |                         |                                                                                                                    |
| Defaulting on vaccination risks baby's life   |                         |                                                                                                                    |
| Vaccination benefits the parent later in life |                         |                                                                                                                    |

**Table 2. Thematic area on enablers of vaccination—Western Area Urban, Sierra Leone, 2018**

| Meaning unit                                           | Category                                | Theme                                                                                                            |
|--------------------------------------------------------|-----------------------------------------|------------------------------------------------------------------------------------------------------------------|
| Immunisation card is important                         | Diversity of immunisation reminders     | Vaccination was facilitated by trusted information exchange and social support coupled with positive experiences |
| Campaign as reminder                                   |                                         |                                                                                                                  |
| Reminders by health workers at vaccination visit       |                                         |                                                                                                                  |
| Husband as reminder                                    |                                         |                                                                                                                  |
| Immunisation card as reminder                          |                                         |                                                                                                                  |
| Other family member as reminder                        |                                         |                                                                                                                  |
| Nurses should lead                                     | Information access and trust            |                                                                                                                  |
| Nurses more trusted than CHWs                          |                                         |                                                                                                                  |
| Same information from different sources                |                                         |                                                                                                                  |
| Immunisation promotion through radio and tv            |                                         |                                                                                                                  |
| Immunisation promotion by health workers               |                                         |                                                                                                                  |
| Immunisation promotion through leaders                 | Getting fathers more involved           |                                                                                                                  |
| Immunisation promotion by NGOs                         |                                         |                                                                                                                  |
| Mothers take the child to the clinic                   |                                         |                                                                                                                  |
| Fathers rarely involved                                | Positive experiences with health worker |                                                                                                                  |
| Father received an award for involvement               |                                         |                                                                                                                  |
| Cordial relationship with nurses                       | Post-vaccination information sharing    |                                                                                                                  |
| Good care by nurses                                    |                                         |                                                                                                                  |
| HWs encourage seeking care at HF                       |                                         |                                                                                                                  |
| Giving money to health worker as token of appreciation |                                         |                                                                                                                  |
| Husband asking about the visit                         |                                         |                                                                                                                  |
| Informing husband of next visit                        |                                         |                                                                                                                  |
| Telling husband about visit expenses                   |                                         |                                                                                                                  |
| Immunisation is a "learning process"                   |                                         |                                                                                                                  |
| Sharing experiences with neighbours or friends         |                                         |                                                                                                                  |
| Other family members asking about the visit            |                                         |                                                                                                                  |



**Table 3. Thematic area on vaccination barriers–Western Area Urban, Sierra Leone, 2018**

| Meaning unit                                     | Category                                              | Theme                                                                                                                                                                         |
|--------------------------------------------------|-------------------------------------------------------|-------------------------------------------------------------------------------------------------------------------------------------------------------------------------------|
| Asking husband for money                         | Preparing for the journey and getting to the clinic   | Vaccination was hindered by practical constraints compounded by negative experiences linked to unfavourable health worker practices and adverse events following immunisation |
| Juggling different household duties              |                                                       |                                                                                                                                                                               |
| Competing priorities                             |                                                       |                                                                                                                                                                               |
| Time taken to get to the clinic                  |                                                       |                                                                                                                                                                               |
| Wasting time at the clinic                       | Inconveniences at the clinic                          |                                                                                                                                                                               |
| Rush to arrive first and seen first              |                                                       |                                                                                                                                                                               |
| Crowding at the clinic                           |                                                       |                                                                                                                                                                               |
| Very long wait at larger health facilities       |                                                       |                                                                                                                                                                               |
| Spent a day and nothing happened                 |                                                       |                                                                                                                                                                               |
| Not respecting caregivers                        | Dissatisfaction with specific practices at the clinic |                                                                                                                                                                               |
| Shouting at caregivers                           |                                                       |                                                                                                                                                                               |
| Wasting caregiver's time                         |                                                       |                                                                                                                                                                               |
| Paying for the card                              |                                                       |                                                                                                                                                                               |
| Paying for free drugs                            |                                                       |                                                                                                                                                                               |
| Paying for weighing                              |                                                       |                                                                                                                                                                               |
| Payment as punishment                            |                                                       |                                                                                                                                                                               |
| Bad care without payment                         |                                                       |                                                                                                                                                                               |
| Health workers should stop demanding money       |                                                       |                                                                                                                                                                               |
| Health worker don't appreciate less than Le 2000 |                                                       |                                                                                                                                                                               |
| Health workers withholding free drugs            | Adverse events following immunisation                 |                                                                                                                                                                               |
| Baby crying throughout the night                 |                                                       |                                                                                                                                                                               |
| Baby gets 'lazy' for few hours                   |                                                       |                                                                                                                                                                               |
| Fever in baby                                    |                                                       |                                                                                                                                                                               |
| Swelling at injection site                       |                                                       |                                                                                                                                                                               |
| Side effects only for some vaccines              |                                                       |                                                                                                                                                                               |
| Rub onion on swollen injection site              |                                                       |                                                                                                                                                                               |
| Avoiding abnormalities from vaccine              |                                                       |                                                                                                                                                                               |
| Afraid of vaccine side effects                   |                                                       |                                                                                                                                                                               |

**Table 4. Thematic area on recommendations to improve childhood immunisation services– Western Area Urban, Sierra Leone, 2018**

| Meaning unit                                 | Category                                         | Theme                                                                   |
|----------------------------------------------|--------------------------------------------------|-------------------------------------------------------------------------|
| Continue campaigns at repeated intervals     | Improving vaccination processes and systems      | Caregivers want improved vaccination processes, systems, and engagement |
| Do not rely on campaigns alone               |                                                  |                                                                         |
| Provision of incentives for caregivers       |                                                  |                                                                         |
| Concentrate on defaulters                    |                                                  |                                                                         |
| Compensation/incentives for nurses           |                                                  |                                                                         |
| Being considerate towards health workers     |                                                  |                                                                         |
| Employ more staff                            |                                                  |                                                                         |
| Stop demanding money                         |                                                  |                                                                         |
| Promote consequences of not vaccinating      | Engaging communities to boost vaccine confidence |                                                                         |
| Peer-to-peer promotion of immunisation       |                                                  |                                                                         |
| Inform about importance of immunisation      |                                                  |                                                                         |
| Address 'stubborn' caregivers                |                                                  |                                                                         |
| Engage caregivers who do not want injections |                                                  |                                                                         |

1  
2  
3  
4  
5  
6  
7  
8  
9  
10  
11  
12  
13  
14  
15  
16  
17  
18  
19  
20  
21  
22  
23  
24  
25  
26  
27  
28  
29  
30  
31  
32  
33  
34  
35  
36  
37  
38  
39  
40  
41  
42  
43  
44  
45  
46  
47  
48  
49  
50  
51  
52  
53  
54  
55  
56  
57  
58  
59  
60

For peer review only

## COREQ (COnsolidated criteria for REporting Qualitative research) Checklist

A checklist of items that should be included in reports of qualitative research. You must report the page number in your manuscript where you consider each of the items listed in this checklist. If you have not included this information, either revise your manuscript accordingly before submitting or note N/A.

| Topic                                          | Item No. | Guide Questions/Description                                                                                                                              | Reported on Page No. |
|------------------------------------------------|----------|----------------------------------------------------------------------------------------------------------------------------------------------------------|----------------------|
| <b>Domain 1: Research team and reflexivity</b> |          |                                                                                                                                                          |                      |
| <i>Personal characteristics</i>                |          |                                                                                                                                                          |                      |
| Interviewer/facilitator                        | 1        | Which author/s conducted the interview or focus group?                                                                                                   |                      |
| Credentials                                    | 2        | What were the researcher's credentials? E.g. PhD, MD                                                                                                     |                      |
| Occupation                                     | 3        | What was their occupation at the time of the study?                                                                                                      |                      |
| Gender                                         | 4        | Was the researcher male or female?                                                                                                                       |                      |
| Experience and training                        | 5        | What experience or training did the researcher have?                                                                                                     |                      |
| <i>Relationship with participants</i>          |          |                                                                                                                                                          |                      |
| Relationship established                       | 6        | Was a relationship established prior to study commencement?                                                                                              |                      |
| Participant knowledge of the interviewer       | 7        | What did the participants know about the researcher? e.g. personal goals, reasons for doing the research                                                 |                      |
| Interviewer characteristics                    | 8        | What characteristics were reported about the interviewer/facilitator? e.g. Bias, assumptions, reasons and interests in the research topic                |                      |
| <b>Domain 2: Study design</b>                  |          |                                                                                                                                                          |                      |
| <i>Theoretical framework</i>                   |          |                                                                                                                                                          |                      |
| Methodological orientation and Theory          | 9        | What methodological orientation was stated to underpin the study? e.g. grounded theory, discourse analysis, ethnography, phenomenology, content analysis |                      |
| <i>Participant selection</i>                   |          |                                                                                                                                                          |                      |
| Sampling                                       | 10       | How were participants selected? e.g. purposive, convenience, consecutive, snowball                                                                       |                      |
| Method of approach                             | 11       | How were participants approached? e.g. face-to-face, telephone, mail, email                                                                              |                      |
| Sample size                                    | 12       | How many participants were in the study?                                                                                                                 |                      |
| Non-participation                              | 13       | How many people refused to participate or dropped out? Reasons?                                                                                          |                      |
| <i>Setting</i>                                 |          |                                                                                                                                                          |                      |
| Setting of data collection                     | 14       | Where was the data collected? e.g. home, clinic, workplace                                                                                               |                      |
| Presence of non-participants                   | 15       | Was anyone else present besides the participants and researchers?                                                                                        |                      |
| Description of sample                          | 16       | What are the important characteristics of the sample? e.g. demographic data, date                                                                        |                      |
| <i>Data collection</i>                         |          |                                                                                                                                                          |                      |
| Interview guide                                | 17       | Were questions, prompts, guides provided by the authors? Was it pilot tested?                                                                            |                      |
| Repeat interviews                              | 18       | Were repeat interviews carried out? If yes, how many?                                                                                                    |                      |
| Audio/visual recording                         | 19       | Did the research use audio or visual recording to collect the data?                                                                                      |                      |
| Field notes                                    | 20       | Were field notes made during and/or after the interview or focus group?                                                                                  |                      |
| Duration                                       | 21       | What was the duration of the interviews or focus group?                                                                                                  |                      |
| Data saturation                                | 22       | Was data saturation discussed?                                                                                                                           |                      |
| Transcripts returned                           | 23       | Were transcripts returned to participants for comment and/or                                                                                             |                      |

| Topic                                  | Item No. | Guide Questions/Description                                                                                                        | Reported on Page No. |
|----------------------------------------|----------|------------------------------------------------------------------------------------------------------------------------------------|----------------------|
|                                        |          | correction?                                                                                                                        |                      |
| <b>Domain 3: analysis and findings</b> |          |                                                                                                                                    |                      |
| <i>Data analysis</i>                   |          |                                                                                                                                    |                      |
| Number of data coders                  | 24       | How many data coders coded the data?                                                                                               |                      |
| Description of the coding tree         | 25       | Did authors provide a description of the coding tree?                                                                              |                      |
| Derivation of themes                   | 26       | Were themes identified in advance or derived from the data?                                                                        |                      |
| Software                               | 27       | What software, if applicable, was used to manage the data?                                                                         |                      |
| Participant checking                   | 28       | Did participants provide feedback on the findings?                                                                                 |                      |
| <i>Reporting</i>                       |          |                                                                                                                                    |                      |
| Quotations presented                   | 29       | Were participant quotations presented to illustrate the themes/findings?<br>Was each quotation identified? e.g. participant number |                      |
| Data and findings consistent           | 30       | Was there consistency between the data presented and the findings?                                                                 |                      |
| Clarity of major themes                | 31       | Were major themes clearly presented in the findings?                                                                               |                      |
| Clarity of minor themes                | 32       | Is there a description of diverse cases or discussion of minor themes?                                                             |                      |

Developed from: Tong A, Sainsbury P, Craig J. Consolidated criteria for reporting qualitative research (COREQ): a 32-item checklist for interviews and focus groups. *International Journal for Quality in Health Care*. 2007. Volume 19, Number 6: pp. 349 – 357

**Once you have completed this checklist, please save a copy and upload it as part of your submission. DO NOT include this checklist as part of the main manuscript document. It must be uploaded as a separate file.**

# BMJ Open

## Qualitative assessment of caregiver experiences when navigating childhood immunisation in urban communities in Sierra Leone

|                                 |                                                                                                                                                                                                                                                                                                                                                                                                                                                                                                                                                                                                                                                                                    |
|---------------------------------|------------------------------------------------------------------------------------------------------------------------------------------------------------------------------------------------------------------------------------------------------------------------------------------------------------------------------------------------------------------------------------------------------------------------------------------------------------------------------------------------------------------------------------------------------------------------------------------------------------------------------------------------------------------------------------|
| Journal:                        | <i>BMJ Open</i>                                                                                                                                                                                                                                                                                                                                                                                                                                                                                                                                                                                                                                                                    |
| Manuscript ID                   | bmjopen-2021-058203.R1                                                                                                                                                                                                                                                                                                                                                                                                                                                                                                                                                                                                                                                             |
| Article Type:                   | Original research                                                                                                                                                                                                                                                                                                                                                                                                                                                                                                                                                                                                                                                                  |
| Date Submitted by the Author:   | 03-Mar-2022                                                                                                                                                                                                                                                                                                                                                                                                                                                                                                                                                                                                                                                                        |
| Complete List of Authors:       | Jalloh, Mohamed; Centers for Disease Control and Prevention, Center for Public Health<br>Patel, Palak; Centers for Disease Control and Prevention; Oak Ridge Institute for Science and Education,<br>Sutton, Roberta; ICAP at Columbia University<br>Kulkarni, Shibani; Centers for Disease Control and Prevention; Oak Ridge Institute for Science and Education,<br>Toure, Mame; ICAP at Columbia University<br>Wiley, Kerrie; The University of Sydney, School of Public Health<br>Sessay, Tom; Sierra Leone Ministry of Health and Sanitation<br>Lahuerta, Maria; ICAP at Columbia University; Columbia University Mailman School of Public Health, Department of Epidemiology |
| <b>Primary Subject Heading</b>: | Public health                                                                                                                                                                                                                                                                                                                                                                                                                                                                                                                                                                                                                                                                      |
| Secondary Subject Heading:      | Qualitative research, Public health, Health services research, Global health                                                                                                                                                                                                                                                                                                                                                                                                                                                                                                                                                                                                       |
| Keywords:                       | Public health < INFECTIOUS DISEASES, Community child health < PAEDIATRICS, Child protection < PAEDIATRICS                                                                                                                                                                                                                                                                                                                                                                                                                                                                                                                                                                          |
|                                 |                                                                                                                                                                                                                                                                                                                                                                                                                                                                                                                                                                                                                                                                                    |

SCHOLARONE™  
Manuscripts

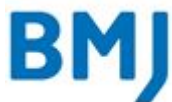

I, the Submitting Author has the right to grant and does grant on behalf of all authors of the Work (as defined in the below author licence), an exclusive licence and/or a non-exclusive licence for contributions from authors who are: i) UK Crown employees; ii) where BMJ has agreed a CC-BY licence shall apply, and/or iii) in accordance with the terms applicable for US Federal Government officers or employees acting as part of their official duties; on a worldwide, perpetual, irrevocable, royalty-free basis to BMJ Publishing Group Ltd ("BMJ") its licensees and where the relevant Journal is co-owned by BMJ to the co-owners of the Journal, to publish the Work in this journal and any other BMJ products and to exploit all rights, as set out in our [licence](#).

The Submitting Author accepts and understands that any supply made under these terms is made by BMJ to the Submitting Author unless you are acting as an employee on behalf of your employer or a postgraduate student of an affiliated institution which is paying any applicable article publishing charge ("APC") for Open Access articles. Where the Submitting Author wishes to make the Work available on an Open Access basis (and intends to pay the relevant APC), the terms of reuse of such Open Access shall be governed by a Creative Commons licence – details of these licences and which [Creative Commons](#) licence will apply to this Work are set out in our licence referred to above.

Other than as permitted in any relevant BMJ Author's Self Archiving Policies, I confirm this Work has not been accepted for publication elsewhere, is not being considered for publication elsewhere and does not duplicate material already published. I confirm all authors consent to publication of this Work and authorise the granting of this licence.

1  
2  
3 TITLE PAGE  
4  
5

6  
7 **Title**

8 Qualitative assessment of caregiver experiences when navigating childhood immunisation in urban  
9 communities in Sierra Leone  
10  
11

12  
13 **Authors**

14 Mohamed F. Jalloh<sup>1</sup>, Palak Patel<sup>1,2</sup>, Roberta Sutton<sup>3</sup>, Shibani Kulkarni<sup>1,2</sup>, Mame Toure<sup>4</sup>, Kerrie Wiley<sup>5</sup>,  
15 Tom Sesay,<sup>6</sup> Maria Lahuerta<sup>3,7</sup>, Sierra Leone Urban Immunisation Needs Assessment Group  
16  
17

18  
19 **Affiliations**

- 20  
21 1. Immunisation Systems Branch, Global Immunisation Division, Centres for Disease Control and  
22 Prevention, Atlanta, Georgia, USA  
23  
24 2. Oak Ridge Institute for Science and Education's Research Participation Program, Centres for  
25 Disease Control and Prevention, Atlanta, Georgia, USA  
26  
27 3. ICAP at Columbia University, Mailman School of Public Health, New York, New York, USA  
28  
29 4. ICAP at Columbia University, Sierra Leone Country Office, Freetown, Sierra Leone  
30  
31 5. School of Public Health, The University of Sydney, Sydney, NSW, Australia  
32  
33 6. Child Health Programme, Ministry of Health and Sanitation, Freetown, Sierra Leone  
34  
35 7. Department of Epidemiology, Mailman School of Public Health, New York, New York, USA  
36

37 **Corresponding author**

38 Mohamed F. Jalloh, PhD, MPH

39 Immunisation systems Branch, Global Immunisation Division, U.S. Centres for Disease Control and  
40 Prevention, Atlanta, Georgia, USA. Email: [yum8@cdc.gov](mailto:yum8@cdc.gov). Tel: +1 (404) 401-2773.  
41  
42  
43  
44

45  
46 **Wordcount**

47 Abstract: 239 words; Manuscript: 5438 words  
48  
49

50  
51 **Keywords**

52 Vaccination, immunisation, vaccine, hesitancy, demand, caregiver, experience, qualitative, methodology,  
53 interpretative phenomenology, urban, slum, Sierra Leone  
54  
55  
56

## ABSTRACT

**Objective:** To gain in-depth understanding of the caregiver experience when navigating urban immunisation services for their children.

**Design:** An exploratory qualitative assessment comprising 16 in-depth interviews using an interpretative phenomenology approach.

**Setting:** Caregivers were purposively recruited from slums (n=8) and other urban communities (n=8) in the capital city of Sierra Leone.

**Participants:** Caregivers of children ages 6 to 36 months old who were fully vaccinated (n=8) or under-vaccinated (n=8).

**Results:** Emotional enablers of vaccination were evident in caregivers' sense of parental obligation to their children while also anticipating reciprocal benefits in children's ability to take care of the parents later in life. Practical enablers were found in the diversity of immunization reminders, information access, information trust, getting fathers more involved, positive experiences with health workers, and post-vaccination information sharing in the community. Underlying barriers to childhood vaccination were due to practical constraints such as overcrowding and long waiting times at the clinic, feeling disrespected by health workers, expecting to give money to health workers for free services, and fear of serious vaccine side effects. To improve vaccination outcomes, caregivers desired more convenient and positive clinic experiences and deeper community engagement.

**Conclusions:** Health system interventions, community engagement, and vaccination outreach need to be tailored to for urban settings. Vaccine communication efforts may resonate more strongly with caregivers when vaccination is framed both around parental responsibilities to do the right thing for the child and the future benefits to the parent.



## STRENGTHS AND LIMITATIONS OF THIS STUDY

- This qualitative assessment describes the caregiver experience in navigating childhood immunisation services in urban settings in a low-income country to gain insights for improving vaccination outcomes.
- The sample comprised of caregivers of fully vaccinated and under-vaccinated children who were purposively recruited to help understand how the two outcomes may be shaped by differences in the caregiver experiences.
- Our sample only comprised one caregiver with a prior child that had experienced a serious vaccine side effect and whose current child had never been vaccinated due to fear of similar side effects.
- The rarity of experiencing serious side effects among children in our sample limits the ability to have a rich understanding of such experiences.

## 1. Introduction

There have been efforts to understand urban immunisation challenges in low- and middle-income countries (LMICs), including in urban slums and informal settlements.<sup>1</sup> Assessment of immunisation barriers in urban areas in LMICs identified a range of practical and social issues, such as population mobility, inaccurate denominators of children due to out-of-date population estimates and poorly defined geographic catchment areas, the lack of trust in the health system among vulnerable groups, overburdened health facilities, and weak community engagement and outreach.<sup>2</sup>

In Sierra Leone, the 2014-2016 Ebola epidemic disrupted the delivery of essential health services, including immunisation services, especially in urban areas.<sup>3,4</sup> Barriers that affected routine health services included the fear of contracting Ebola in health facilities, stigmatization of health workers, and shifting of resources to the epidemic.<sup>5</sup> As the Ebola epidemic waned, measles outbreaks became more frequent due to the decline in vaccination.<sup>6</sup> In the aftermath of the Ebola epidemic, the Government of Sierra Leone and its partners made major investments to rebuild health systems and restore public confidence in the health system.<sup>7,8</sup> However, challenges in access to and the uptake of immunisation services persist, including in urban areas.<sup>9</sup>

The United Nations Children's Fund (UNICEF) and partners developed the Caregiver Journey Framework to guide countries in understanding the experiences, processes, and structures that shape how caregivers seek and receive health services for their children, including essential immunisation.<sup>10</sup> In 2018, we operationalized the Caregiver Journey Framework through a qualitative approach in the Western Area Urban district (WAU) in Sierra Leone. Implementation experiences from operationalizing the framework in the context of urban immunization has been described elsewhere.<sup>11</sup> The framework was operationalized into several domains to understand decision-making and preparation for vaccination visits, making the journey to clinics, experiences during vaccination visits, and post-vaccination experiences. Building on these domains, we aimed to describe the real-world experiences of caregivers of vaccine-eligible children as they navigate urban immunisation services in Sierra Leone to identify vaccination enablers and barriers.

## 2. Methods

We aimed to understand how household dynamics, social factors, and formal healthcare delivery systems influence childhood immunisation uptake via the lens of primary caregivers of vaccine-eligible children in urban settings in Sierra Leone. Hence, we developed the Immunisation Caregiver Journey Interviews

(ICJI) approach<sup>11</sup> based on the Caregiver Journey Framework using principles of interpretative phenomenology,<sup>12 13</sup> which focuses on elucidating the essence of common experiences to explain, interpret, and make sense of a phenomenon.<sup>14</sup> We used a phenomenological approach to explore the lifeworld of caregivers in how they navigate childhood immunisation for their children repeatedly in low-resource, urban settings.<sup>11</sup> A semi-structured ICJI guide was used to explore the following domains: Decision-making and preparation, making the journey, experiences during vaccination visit, post-vaccination experiences, intentions to return, and perceptions of immunisation promotion activities in the community.

## 2.1. Setting

The WAU district in Sierra Leone comprises most of the capital city of Freetown with approximately 1.2 million inhabitants.<sup>15</sup> The district was heavily affected by the Ebola epidemic, partly due to high population movements and crowded housing conditions.<sup>16</sup> On average, there is less than one medical doctor per 10,000 population.<sup>17</sup> The Government of Sierra Leone introduced the Free Health Care Initiative in 2010 to remove cost barriers for essential health services for pregnant and lactating mothers and under-five children.<sup>18</sup> Childhood immunisation services are delivered through the Expanded Program on Immunisation using fixed sites that are supplemented by community outreach services to be conducted five times monthly.<sup>19</sup> Each catchment community has 10 community health workers (CHWs) who support the promotion of health services on a voluntary basis.<sup>20</sup> A coverage survey in 2019 estimated 86% coverage for three doses of diphtheria-pertussis-tetanus (DPT) vaccine in slums and 92% coverage in non-slum urban areas in the WAU district. However, coverage of the second dose of measles-containing vaccine was very low in the district (33% in slums and 29% in non-slum urban areas).<sup>9</sup>

## 2.2. Sampling and data collection

The sample size for this qualitative assessment was guided by an approach that focuses on *qualitative information power*.<sup>21</sup> The concept of information power posits that researchers should determine the sample size in a qualitative assessment based on the aim (narrow versus broad), sample specificity (targeting specific group versus multiple groups), theoretical underpinning (application of theory or no theory), quality of dialogue (weak or strong), and analysis strategy (within-case only or cross-case). Sample size burden increases when the aim is broad, multiple groups are targeted in the sample, the assessment is theory-driven, the quality of the dialogue is weak, and transcripts are analysed using cross-case analysis. In our assessment, the aim was narrow, the sample targeted a specific group, we applied theory to guide the assessment, the transcripts contained rich information, and we conducted both within-case and cross-case analyses. Against these considerations, we interviewed 16 caregivers and

1  
2  
3 progressively reviewed debrief notes from the interviews to assess information power. In analysing the  
4 transcripts, we concluded that we reached saturation with the 16 interviews and likely could have stopped  
5 interviewing after the 12th interview.  
6  
7

8  
9 We purposively recruited the caregivers from eight communities in the WAU district, four of which were  
10 slums and four were other urban areas in the district to maximize variation in the sample. Within each  
11 community, two caregivers of children ages 6-36 months were selected to capture a breadth of caregiver  
12 experiences of caregivers with vaccine eligible children—one whose child was fully vaccinated for age  
13 and another whose child had missed at least one scheduled vaccination visit. CHWs supported data  
14 collection teams in visiting households to identify and recruit eligible caregivers in the selected  
15 communities. Snowball sampling was used as a secondary sampling strategy when the first identified  
16 caregiver declined to interview but knew of other caregivers in the community with vaccine-eligible  
17 children or when CHWs were only successful in identifying just one eligible caregiver. In this form of  
18 snowball sampling, a previously visited household with an eligible child would point data collectors to  
19 other households with potentially eligible children (i.e., vaccine eligible children). Data collectors visited  
20 such households to screen for eligibility. This process continued until two caregivers of eligible children  
21 were successfully recruited and interviewed from a particular community. Interviews were conducted on  
22 the same of day of recruitment after obtaining informed consent from the caregiver.  
23  
24  
25  
26  
27  
28  
29  
30  
31  
32

33 We recruited data collectors (interviewers and notetakers) who were fluent in English and the  
34 predominant local language in the WAU district (Krio). The data collectors had post-secondary  
35 educational training in social sciences and were experienced in conducting qualitative data collection in  
36 Sierra Leone. Two behavioural scientists trained the facilitators for a week on the assessment protocol.  
37 One of the trainers was from Sierra Leone and had experience conducting social science research in Sierra  
38 Leone. During the training, the English version of the guide was translated into Krio by locally hired staff  
39 together with the facilitators and trainer. The data collectors were trained on how to probe on the spot to  
40 obtain additional pertinent information from caregivers. Data collection occurred in August–September  
41 2018. All interviews were audio-recorded with permission from participants; they were then transcribed  
42 and translated into English by the local team. Interviews lasted about an hour on average and were  
43 conducted in the vicinity of the homes of the caregivers. Data collection teams were trained on choosing  
44 suitable interview locations to enable caregivers to speak freely. The facilitators conducted debriefing  
45 sessions immediately after each interview to make note of key experiences and observations. The  
46 debriefing notes were not part of the formal analysis. However, during the field work, the debriefing notes  
47 were used to progressively assess data saturation and to identify key insights emerging from the  
48  
49  
50  
51  
52  
53  
54  
55  
56  
57

1  
2  
3 interviews. We used the insights from the debrief notes to develop a preliminary report that was mostly in  
4 a descriptive, narrative form. The de-identified preliminary report was shared with the Sierra Leone  
5 Ministry of Health and Sanitation. We have previously documented practical lessons learned from  
6 implementing the assessment in Sierra Leone.<sup>11</sup>  
7  
8  
9

### 10 11 **2.3. Data analysis**

12 Two analysts (one male, one female) read all transcripts and created analytic memos and then analysed  
13 the transcripts using both within-case and cross-case analysis. In the within-case analysis, we developed a  
14 narrative profile for each caregiver to bring key aspects of their lived experiences to the foreground. In the  
15 initial part of the cross-case analysis, each analyst coded three different transcripts (six total), using an  
16 inductive approach to identify and interpret meaning units within the text. To gain alternative  
17 interpretations of the coded meaning units, three of the coded transcripts were shared with a third  
18 qualitative expert, who was not involved in the previous stages of the assessment, for independent ‘blind’  
19 coding of the transcripts. Feedback from the third analyst was discussed by the two primary analysts and  
20 incorporated into the coding scheme. The analysts used an iterative process to review their codes, discuss  
21 their interpretations of the manifest content, and harmonize the initial set of codes that were used for  
22 coding the remaining manuscripts. NVivo software (QSR International–2018, Version 12) was used for  
23 the final organization and coding of the transcripts. Manifest categories of meaning units were grouped to  
24 reflect latent content that was developed into cross-cutting themes via a consultative process. Throughout  
25 the process, the analysts exercised reflexivity regarding subjective interpretations and iteratively re-  
26 examined the transcripts to identify alternative interpretations until consensus was reached with additional  
27 inputs from the co-authors.  
28  
29  
30  
31  
32  
33  
34  
35  
36  
37  
38  
39

### 40 **2.4. Ethical approval**

41 The assessment was approved by the Sierra Leone Ethics and Scientific Review Committee (SLESRC-  
42 17052018), Columbia University Medical Centre Institutional Review Board (IRB-AAAR9031), and the  
43 Centre for Global Health at the U.S. Centres for Disease Control and Prevention (CGH-2018-184). All  
44 participants provided written informed consent.  
45  
46  
47  
48

### 49 **2.5. Patient and public involvement**

50 No patient involved.  
51  
52  
53  
54

## 55 **3. Results**

1  
2  
3 All respondents were the biological mothers of the sampled children except for one female guardian. The  
4 median age was nine months for the children included in the assessment. At the time of the interviews,  
5 half of the children had missed at least one scheduled vaccine dose. Three themes emerged from the  
6 interviews around vaccination enablers (Table 1), vaccination barriers (Table 2) and direct  
7 recommendation to improve vaccination uptake (Table 3). There were no notable differences in themes  
8 between slums and other urban communities.  
9  
10  
11  
12  
13

### 14 **3.1. Enablers of childhood vaccination (Table 1)**

15  
16 Our analysis identified emotional and practical enablers related to childhood vaccination. Emotional  
17 enablers were evident in how caregivers portrayed their parental obligation to their children, wanting to  
18 do the right thing for their children's health, and anticipating reciprocal benefits in children's ability to  
19 take care of the parents later in life. Practical enablers were the diversity of immunization reminders,  
20 information access, information trust, getting fathers more involved, positive experiences with health  
21 workers, and post-vaccination information sharing at the community level.  
22  
23  
24  
25  
26

#### 27 **3.1.1. Parental responsibility**

28 A sense of parental responsibility was a major motivating factor for caregivers to seek vaccination  
29 services for their children. Caregivers viewed vaccination as 'doing the right thing' for their children.  
30 Even caregivers who had missed scheduled vaccination visits felt responsible for getting their children  
31 caught up with their scheduled vaccine doses, which often required deprioritizing other income-  
32 generating activities.  
33  
34  
35

36 *"It is my duty to take my baby to the hospital for immunisation. It is my responsibility as [a]*  
37 *mother to ensure that my baby completes the rounds of immunisation without defaulting."* –

38  
39 Caregiver whose child had missed a scheduled vaccination  
40  
41  
42

#### 43 **3.1.2. Wanting a strong and healthy baby**

44 In addition to the affective responses regarding a sense of duty to the child, appreciating the overall health  
45 benefits of vaccination to their children was another major driving force in motivating caregivers to seek  
46 vaccination services. Caregivers consistently expressed that immunisation has essential health benefits to  
47 the child and that missing scheduled vaccination would 'risk the baby's life.' Moreover, they valued  
48 having a 'strong and healthy baby' and felt that completing the vaccination schedule would positively  
49 impact the baby's health.  
50  
51  
52  
53  
54  
55  
56  
57  
58  
59  
60

1  
2  
3 *“I think [the] vaccine is good for our children. It is important and it helps to build their immune*  
4 *system to keep them strong and healthy; it fights against many things in the body...”* – Caregiver  
5 whose child was fully vaccinated  
6  
7

### 9 **3.1.3. Parental anticipation of reciprocal benefit**

11 Perceptions of vaccination benefits went beyond the direct health benefits to children and extended into  
12 domains of benefit to the parent. The notion that vaccinated children will be healthier and in turn live  
13 longer and be able to take care of their parents later in life emerged as a dimension of vaccination benefit  
14 to the parent. The duality of vaccination benefit is likely grounded in the cultural context of parents  
15 expecting reciprocal care from their children when the parents can no longer care for themselves.  
16  
17

19 *“It is very difficult for me to be absent for immunisation or not to take my baby to the hospital*  
20 *when sick. Sometimes people think I’m mad but I’m not. I’m trying to bring up my children in a*  
21 *way that they will benefit me when I’m old.”* – Caregiver whose child had missed a scheduled  
22 vaccination  
23  
24

### 27 **3.1.4. Diversity of immunisation reminders**

28 Caregivers were exposed to numerous reminders and cues to vaccinate their children, including  
29 information from the immunisation cards, health workers, community campaigns, and family members.  
30 However, the child’s immunisation card stood out as the most important reminder that caregivers and  
31 families relied on to remember the dates of the scheduled vaccination visits.  
32  
33

35 *“I do remind myself because they [health workers] will write at the back of the immunisation*  
36 *card the date for the next visit. The immunisation card will tell you the date for the next visit.* –  
37 Caregiver whose child had missed a scheduled vaccination  
38  
39

41 In addition, community outreach campaigns and announcements in the community were also viewed as  
42 helpful reminders to vaccinate.  
43

44 *“The health workers in this community and the CHWs are doing well as they do go round telling*  
45 *people not to forget to take their babies to the hospital for immunisation.”* – Caregiver whose  
46 child had missed a scheduled vaccination  
47  
48

### 51 **3.1.5. Information access and information trust**

52 Immunisation information sources varied, but caregivers consistently cited health workers as trusted  
53 sources of information. Nurses were more trusted than lay CHWs because caregivers viewed nurses as  
54  
55

1  
2  
3 more knowledgeable. While waiting in line before immunisation services, most caregivers appreciated the  
4 ‘health talk’ they received from nurses who advised on health and immunisation.  
5

6 *“I trust them [nurses] because they are a team of qualified nurses ... Before they come here, they*  
7 *know everything about the vaccines and any implications of the vaccines. They are able to*  
8 *explain more than the CHWs and other community workers in the area. The nurses will tell you*  
9 *more. There are things that the community workers do not know, and they refer you to the*  
10 *nurses.”* – Caregiver whose child was fully vaccinated  
11  
12  
13  
14  
15

### 16 **3.1.6. Getting fathers more involved**

17 Mothers desired greater involvement by the child’s fathers in supporting their children’s vaccination. In  
18 most instances, fathers were rarely involved in taking their children to the vaccination clinic. We  
19 uncovered only two instances when fathers actively supported their children’s vaccination visits. In those  
20 instances, the mothers felt supported, and their children were fully vaccinated. In one situation, a father  
21 that routinely accompanied the child to the vaccination clinic was celebrated by health workers and given  
22 the ‘best father’ award.  
23  
24  
25

26 *“There was [a] time when he [my husband] was given the best father award [at the clinic]*  
27 *because he is always with me at the hospital. That is the name I have also given to my husband.*  
28 *Even when the baby is crying, I will say ‘best father’ take your baby.”* – Caregiver whose child  
29 was fully vaccinated  
30  
31  
32  
33  
34

### 35 **3.1.7. Positive experiences with health workers**

36 During vaccination visits, positive experiences with health workers encouraged caregivers to vaccinate  
37 their children. Positive experiences included having a cordial relationship with the health workers. In  
38 particular, caregivers expressed that the nurses took good care of their children, made them feel  
39 comfortable, and tried to build a good rapport. Some caregivers said they would voluntarily give small  
40 amounts of money to health workers as a token of their appreciation after vaccinating the child.  
41  
42  
43

44 *“...the nurses do encourage you and will make jokes so that you will laugh at the end of the day.*  
45 *There is a lot of fun [interactions], which made some of us forget about our stresses.”* –  
46 Caregiver whose child was fully vaccinated  
47  
48  
49  
50

### 51 **3.1.8. Post-vaccination information sharing**

52 Information exchange at the community level with trusted community members strengthened caregiver  
53 confidence in childhood vaccination. Upon returning home from the vaccination visit, caregivers often  
54 discussed the clinic experience with their spouses, families, and other caregivers in the community. In  
55  
56  
57



1  
2  
3 addition to information obtained from health workers at the clinic, caregivers also sought advice from  
4 other ‘more experienced’ caregivers in the community.

5  
6 *“Most times after immunisation, my baby will run a temperature, but the health workers always*  
7 *provide drugs to counter the fever. We have caregivers in this community with vast knowledge*  
8 *and since this is my first baby, I love to talk to them so that we can share our experiences which*  
9 *will be of advantage to me as I’m very new in the field [of parenting].” –Caregiver whose child*  
10 *was fully vaccinated*  
11  
12  
13

### 14 15 16 **3.2. Theme 2. Barriers related to childhood vaccination (Table 2)**

17 Practical constraints, negative experiences with health workers, and safety concerns were the underlying  
18 barriers to childhood vaccination. Practical constraints included challenges faced when preparing for and  
19 getting to the vaccination clinic and inconveniences encountered at the clinic, such as overcrowding and  
20 long waiting times. Negative experiences among caregivers included feeling disrespected by health  
21 workers while simultaneously expecting to give money to health workers for services that are supposed to  
22 be free of charge. Finally, vaccine side effects led to concerns and fears about vaccine safety.  
23  
24  
25  
26  
27

#### 28 29 **3.2.1. Preparing for the journey and getting to the clinic**

30 Caregivers commonly cited the need to juggle ‘household duties’ and other income-generating activities  
31 when planning the visit as a barrier, especially in the absence of fathers’ involvement in taking the child  
32 to the clinic. In addition, mothers frequently depended on their children’s fathers for financial support to  
33 cover the expenses related to the vaccination clinic visit. Some caregivers recounted needing to travel  
34 long distances up to an hour by foot to get to the vaccination clinic, especially when they could not afford  
35 public transportation.  
36  
37  
38  
39  
40

#### 41 42 **3.2.2. Inconveniences at the clinic**

43 Caregivers anticipated various inconveniences at the vaccination visit. The prolonged time spent waiting  
44 for the child to be vaccinated emerged as a substantial inconvenience that was more pronounced when  
45 seeking immunisation services, especially in larger facilities. Anticipating the long wait, caregivers  
46 usually tried to arrive early at the vaccination site to get seen first. The range of activities involved with  
47 the child health visit prolonged the visit, including weighing the baby as part of growth monitoring and  
48 other health checks.  
49  
50  
51

52 *“It is painful if you waste much time at the health facility because you have other issues to attend*  
53 *to. To avoid that, that is why I always come early to the health facility.” – Caregiver whose child*  
54 *was fully vaccinated*  
55  
56  
57

### 3.2.3. Feeling disrespected by health workers

Caregivers often felt disrespected by health workers during the vaccination visit. A key complaint was that health workers shouted at caregivers and sometimes used vulgar language toward caregivers. In other instances, they complained that some health workers habitually arrived late to the vaccination session, which further prolonged the time caregivers spent waiting.

### 3.2.4. Monetary expectations

Systemically hidden costs generated substantial dissatisfaction among caregivers. Caregivers needed to “shake hands” with health workers at different times of the visit (e.g., first time registering the child to get a card, before entering the facility, and before weighing the baby). Shaking hands implied giving some money during the handshake. Caregivers used the money to ‘fast-track’ their children’s vaccination. The expectations around monetary exchange discouraged caregivers who could not afford to shake hands with health workers.

*“Sometimes if I don’t want to spend much time at the hospital, I will shake the hand of the nurse so that they can fast track the immunisation of my baby. I will give them something like two thousand Leones or whatever I have with me at that moment... Health is wealth and they [health workers] don’t need us but we do [need them]. The money we give is nothing compared to the health of our children... At the end of the day, we will grumble on our way home as the services are supposed to be free for our children, yet we are paying for it. The health workers are really trying, but the idea for them to take money from us is bad. And if you don’t give them money, they will talk to you carelessly.”* – Caregiver whose child was fully vaccinated

In a separate domain of monetary exchange, health workers demanded money as a form of ‘punishment’ to caregivers who missed their children’s scheduled vaccination appointments.

*“If you failed to take your baby to the hospital on [the] stipulated date, you will definitely have to pay some amount at the end of the day in the form of punishment. You must pay five thousand or more.”* – Caregiver whose child was fully vaccinated

### 3.2.5. Vaccine side effects

Caregivers cited numerous instances when their children experienced vaccine side effects such as ‘fever,’ ‘swelling at the injection site,’ and the ‘baby becoming lethargic.’ Fever was the most common side effect, and the caregivers knew to administer fever-reducing medication as instructed by health workers.

1  
2  
3 When there was swelling at the injection site, a common practice among caregivers was to massage the  
4 swollen area, sometimes with an onion or a bar of soap to try to reduce the swelling.  
5

6 *“Sometimes my baby’s leg becomes swollen... because some nurses are heavy-handed, and I meet*  
7 *several nurses when I visit the hospital. Sometimes the leg gets swollen, and they treat him. I have*  
8 *to rub the leg to avoid swelling... I use soap to rub off the swelling and I give Panadol to stop the*  
9 *fever... some people say you should not allow every nurse to administer [an]injection to the child.*  
10 *I should have a permanent nurse that gives injection to my child without swelling.” – Caregiver*  
11 *whose child missed a scheduled vaccination*  
12  
13  
14  
15

16  
17 In one rare situation, a caregiver had a prior child who experienced fever, convulsed, and died a few days  
18 after getting vaccinated. Therefore, the caregiver decided to not vaccinate subsequent children.  
19

20 *“After the immunisation, my baby started running temperature, I administered paracetamol as I*  
21 *was told by the health workers. The baby convulsed and that was the end of that baby. I don’t*  
22 *want a repeat of that in my life. I have therefore decided not to take my babies for immunisation*  
23 *anymore” – Caregiver whose child missed a scheduled vaccination*  
24  
25  
26  
27

28 Besides passive acceptance of the BCG vaccine at the birth of the youngest child, this same caregiver  
29 actively refused all other vaccines despite encouragement by a family member to vaccinate the child.  
30

31 *“I’m not outrightly saying it was as a result of the immunisation [that my child died]; as every*  
32 *death is the work of God. But from what I have gathered so far, I have personally decided not to*  
33 *take my baby to the health facility to be immunized. It is not that I’m tired of going to the health*  
34 *facility or because of the distance or money. I do get a lot of pressure from my aunt to take my*  
35 *baby to the health facility for immunisation, but the thing is that I just don’t trust the system and*  
36 *what immunisation does. – Caregiver whose child missed a scheduled vaccination*  
37  
38  
39  
40  
41

42 From the perspective of this same caregiver, the vaccinated child died but the unvaccinated children  
43 survived and thrived, which was cited as a reason for refusing vaccination.  
44

45 *“I believe in exclusive breastfeeding, sometimes for two years and a half and sometimes [only]*  
46 *two years. My baby is now two years seven months old and doing well like any of those children*  
47 *that are on immunisation or have completed...Just as I was saying, sometimes my heart will tell*  
48 *me to take the baby for immunisation but after thinking of the past experience, I would decide not*  
49 *to. I’m now used to that... The simple fact here is that, since the other children are doing well*  
50 *without immunisation, I will not take [the baby] to the health facility for immunisation and that is*  
51 *all.” – Caregiver whose child missed a scheduled vaccination*  
52  
53  
54  
55  
56  
57

### 3.3. Recommendations to improve childhood vaccination (Table 3)

The direct recommendations provided by caregivers were categorized into (1) improving vaccination process and systems and (2) engaging communities to boost vaccine confidence. Implementing community outreach campaigns for immunisation at regular intervals with a focus on defaulters was recommended by participants to improve vaccination outcomes. In addition, caregivers wanted health workers and community leaders to be involved in immunisation promotion along with the CHWs. They wanted the vaccination clinic experience to improve and become more conducive to caregivers, including shorter wait time at the clinic and more positive interactions with health workers. Lastly, caregivers wanted health workers to stop demanding money from them, though they may not mind giving money, out of free-will, as a token of appreciation when they could afford it.

*“In addition, you should engage the Chiefs, because in each area we have Chiefs to spread out this message. You could educate them so that they in turn can educate those in the community. Let us have Town Criers go around disseminating the messages. It would be nice for them to allocate people in the health centre who move from house to house to educate the breastfeeding mothers because some of us are stubborn to come onboard.”* – Caregiver whose child was fully vaccinated

## 4. Discussion

Our qualitative analysis highlighted several important themes. In the backdrop of anticipated benefits to both the child and parent, vaccination intention was motivated by a feeling of parental responsibility to ‘do the right thing.’ Timely and trusted exchange of information together with social support and positive experiences at the vaccination clinic were important facilitators of vaccination. In contrast, vaccination was discouraged by negative interactions with health workers at the clinic, the occurrence and fear of vaccine side effects, multitude of ‘hidden’ costs, juggling vaccination with other responsibilities, and inconveniences, such as long traveling time to the clinic and long delays at the clinic. Nevertheless, caregivers were resilient in devising ways to try to get their children vaccinated such as walking on foot up to an hour to get to the clinic when they could not afford public transportation. Lastly, caregivers wanted the vaccination experience to improve, and they desired stronger community engagement to help optimize vaccination outcomes. However, systemic issues, such as informal payments, overcrowding in health facilities, and the reported overburdened health workers may require interventions at the health systems level. These themes from Sierra Leone provide in-depth insights regarding the motivations, facilitators, and barriers of vaccination in an urban LMIC setting.

1  
2  
3  
4  
5 Moral values may shape vaccination attitudes.<sup>22</sup> Philosophical arguments regarding the morality of  
6 vaccination have been heavily debated.<sup>23-26</sup> Caregivers in our sample largely viewed vaccination via a  
7 moral lens encompassing parental duty to do the right thing for the child. In one situation, however, we  
8 found that the desire to ‘do the right thing’ may also translate into vaccination refusal in the backdrop of  
9 other past refusals, observing ‘healthy unvaccinated’ children, and having distrust of the health system.  
10 Quantitative research from high-income countries has shown that parents with unvaccinated children were  
11 more likely to perceive their children to be at low risk of vaccine-preventable diseases and were more  
12 likely to perceive low vaccine effectiveness and safety compared to parents with vaccinated children.<sup>27</sup>  
13 Our findings suggest that childhood immunisation communication efforts may resonate more strongly  
14 with caregivers when vaccination is framed around parental responsibilities to do the right thing for the  
15 child and the anticipated future benefits to parents. However, additional research is necessary to generate  
16 a better understanding of the morality of childhood vaccination in the Sierra Leonean context.  
17  
18  
19  
20  
21  
22  
23  
24

25 Across the interviews, there was an apparent tension in the relationship between caregivers and health  
26 workers. Caregivers often expressed their appreciation of health workers and empathized with the  
27 challenging context in which they do their work. Health workers were strongly viewed as authoritative  
28 sources of trusted information regarding immunisation and the child’s health, which is consistent with  
29 findings from high-income countries<sup>28-30</sup> and LMICs.<sup>31 32</sup> Our findings on the role of monetary exchange  
30 in vaccination exemplify the complex relationship between caregivers and health workers in low-resource  
31 urban communities in Sierra Leone. Some caregivers voluntarily gave money to health workers as a  
32 ‘token of appreciation’ while others begrudgingly gave money because they viewed it as a condition for  
33 receiving good quality service from health workers. Interventions at the health systems level are  
34 necessary to help discourage informal payments to health workers—a practice that may perpetuate  
35 vaccination inequities among poor caregivers who are unable to meet monetary expectations.  
36  
37  
38  
39  
40  
41  
42  
43

44 Our findings also illuminate the need for interventions at the household and family level. Fathers were  
45 rarely involved in taking their children to the vaccination clinic but were often engaged in the decision-  
46 making processes. In the few instances when fathers were involved in taking their children to the clinic,  
47 the mothers felt supported, and their children were fully vaccinated. A study in Nigeria found that  
48 paternal involvement in immunisation was greater in rural settings compared to urban settings.<sup>33</sup> In urban  
49 areas, the same study found that paternal involvement was greater among educated fathers compared to  
50 uneducated fathers. In a separate study in Ghana, the involvement of educated fathers in the vaccination  
51 decision was associated with timelier vaccination uptake compared to the involvement of uneducated  
52  
53  
54  
55  
56  
57  
58  
59  
60

1  
2  
3 fathers in the decision.<sup>34</sup> More broadly, shifting from a mother-child dyad to a family triad in the care of  
4 children has proven to have positive effects on paediatric health outcomes across diverse contexts.<sup>35</sup>  
5 Additional assessments and interventions are needed to explore and evaluate culturally appropriate ways  
6 to enhance the involvement of fathers in childhood immunisation in Sierra Leone and other similar LMIC  
7 settings.  
8  
9  
10

11  
12 Existing evidence suggests that vaccine safety concerns, often linked to adverse events following  
13 immunisation (AEFI), contribute to vaccine hesitancy.<sup>36 37</sup> Serious AEFIs may be ‘triggering events’ for  
14 derailing vaccine confidence and prompting active refusal among certain caregivers and their  
15 communities—especially when the serious AEFI is perceived to be linked to the vaccine or the  
16 vaccination process.<sup>38</sup> Together with prior evidence, these findings emphasize the need for robust AEFI  
17 surveillance and investigations<sup>39</sup> to identify, counsel, and follow-up with caregivers whose children  
18 experience AEFI, and therefore, are potentially at risk of missing subsequent vaccination. Health workers  
19 and CHWs may benefit from periodic in-service training on how to effectively communicate vaccine  
20 safety and address concerns about AEFIs.<sup>40</sup>  
21  
22  
23  
24  
25  
26  
27

#### 28 **4.1. Limitations**

29  
30 There were several limitations to our assessment. First, it is possible that some nuanced meaning may  
31 have been lost when translating the audio recordings from Krio to English—especially since the  
32 transcripts were not back-translated from English to Krio due to resource constraints. Second, we only  
33 identified one caregiver who routinely and actively refused all vaccines for her child after experiencing a  
34 serious AEFI, which may reflect the overall rarity of zero-dose unvaccinated children in Sierra Leone  
35 (approximately 3%).<sup>41</sup> This was the only caregiver with a child that experienced a serious AEFI in our  
36 sample, which limits our ability to have a rich understanding of such experience among caregivers more  
37 broadly and the potential linkages to vaccination refusal. Although such experiences of serious AEFI are  
38 rare, they may have the tendency to get publicized in the community, which may negatively influence  
39 vaccination decisions among other caregivers. Taken together, our results call for additional qualitative  
40 assessments to get a deeper understanding of vaccination refusal within the Sierra Leonean context and  
41 other low-resource LMIC settings. Sampling strategies may therefore need to be adapted accordingly to  
42 focus on caregivers who actively refuse vaccination for their children. Lastly, our findings reflected  
43 gender dimensions that may be based on sociocultural norms in Sierra Leonean society but may also be  
44 due to sampling bias because the caregivers we conveniently recruited were mostly stay-at-home mothers.  
45  
46  
47  
48  
49  
50  
51  
52  
53  
54

#### 55 **5. Conclusions**

1  
2  
3 As the COVID-19 pandemic disrupts childhood immunisation globally,<sup>42</sup> especially in LMICs, our  
4 assessment provides a foundational understanding of the challenges that caregivers encounter in urban  
5 settings in Sierra Leone. It also sheds light on opportunities to improve vaccination outcomes in urban  
6 poor settings, which is a global immunisation priority. The findings show that health system  
7 interventions, community engagement, and vaccination outreach may need to be tailored to for urban  
8 settings. Vaccine communication efforts may resonate more strongly with caregivers when vaccination is  
9 framed both around parental responsibilities to do the right thing for the child and the future benefits to  
10 the parent.  
11  
12  
13  
14  
15

### 16 17 **Competing interests**

18 None declared.  
19  
20  
21

### 22 **Data availability**

23 All data relevant to the study are included in the article or uploaded as supplementary information.  
24  
25  
26

### 27 **Contributors**

28 MFJ, RS, MT, TS, and ML designed the assessment. MFJ, PP, SK, and KW analysed the data. MJF, PP,  
29 RS, SK, MT, KW, TS, and ML contributed to the interpretation of the results. MFJ, PP and SK drafted  
30 the manuscript. RS, MT, KW, TS, and ML contributed to revising the manuscript. All authors reviewed  
31 and approved the final manuscript.  
32  
33  
34  
35  
36

### 37 **Collaborators**

38 Adewale Akinjeji, Laura Conklin, Oliver Eleeza, Lauren E Parmley, Anthony Mansaray, Dimitri  
39 Prybylski, Roberta Sutton, Mame Toure, Aaron Wallace, Brent Wolff  
40  
41  
42

### 43 **Acknowledgements**

44 We thank the 16 caregivers who participated in the in-depth interviews.  
45  
46  
47

### 48 **Funding**

49 U.S. Centers for Disease Control and Prevention (U19GGH001581).  
50  
51  
52

### 53 **Disclaimer**

54  
55  
56  
57  
58  
59  
60

The findings and conclusions in this paper are those of the authors and do not necessarily represent the official position of the US Centres for Disease Control and Prevention.

## 6. References

1. Nelson KN, Wallace AS, Sodha SV, et al. Assessing strategies for increasing urban routine immunization coverage of childhood vaccines in low and middle-income countries: A systematic review of peer-reviewed literature. *Vaccine* 2016;34(46):5495-503. doi: 10.1016/j.vaccine.2016.09.038 [published Online First: 2016/10/25]
2. JSI. Strengthening Immunization for the Urban Poor: Experiences and Lessons Learned from Five Country Studies 2018. Available from: <https://www.jsi.com/resource/strengthening-immunization-for-the-urban-poor-experiences-and-lessons-learned-from-five-country-studies/> [accessed November 12 2020].
3. Brolin Ribacke KJ, Saulnier DD, Eriksson A, et al. Effects of the West Africa Ebola Virus Disease on Health-Care Utilization - A Systematic Review. *Frontiers in public health* 2016;4:222. doi: 10.3389/fpubh.2016.00222 [published Online First: 2016/10/26]
4. Elston JW, Cartwright C, Ndumbi P, et al. The health impact of the 2014-15 Ebola outbreak. *Public health* 2017;143:60-70. doi: 10.1016/j.puhe.2016.10.020 [published Online First: 2017/02/06]
5. Yerger P, Jalloh M, Coltart CEM, et al. Barriers to maternal health services during the Ebola outbreak in three West African countries: a literature review. *BMJ Glob Health* 2020;5(9) doi: 10.1136/bmjgh-2020-002974 [published Online First: 2020/09/09]
6. Masresha BG, Luce R, Jr., Weldegebriel G, et al. The impact of a prolonged ebola outbreak on measles elimination activities in Guinea, Liberia and Sierra Leone, 2014-2015. *Pan Afr Med J* 2020;35(Suppl 1):8. doi: 10.11604/pamj.supp.2020.35.1.19059 [published Online First: 2020/05/07]
7. GoSL. National Ebola Recovery Strategy for Sierra Leone 2015 [Available from: [https://ebolaresponse.un.org/sites/default/files/sierra\\_leone\\_-\\_national\\_recovery\\_strategy\\_2015-2017.pdf](https://ebolaresponse.un.org/sites/default/files/sierra_leone_-_national_recovery_strategy_2015-2017.pdf) accessed December 5 2020.
8. CDC. Global Health – Sierra Leone 2019 [Available from: <https://www.cdc.gov/globalhealth/countries/sierra-leone/default.htm> accessed December 5 2020.
9. Feldstein LR, Sutton R, Jalloh MF, et al. Access, demand, and utilization of childhood immunization services: A cross-sectional household survey in Western Area Urban district, Sierra Leone, 2019. *Journal of global health* 2020;10(1):010420. doi: 10.7189/jogh.10.010420 [published Online First: 2020/06/09]
10. UNICEF. Human Centered Design 4 Health 2018 [Available from: <https://www.hcd4health.org/> accessed November 18 2020.
11. Jalloh MF, Kinsman J, Conteh J, et al. Barriers and facilitators to reporting deaths following Ebola surveillance in Sierra Leone: implications for sustainable mortality surveillance based on an exploratory qualitative assessment. *BMJ Open* 2021;11(5):e042976. doi: 10.1136/bmjopen-2020-042976 [published Online First: 2021/05/15]
12. Diekelmann NL. Learning-as-testing: a Heideggerian hermeneutical analysis of the lived experiences of students and teachers in nursing. *ANS Advances in nursing science* 1992;14(3):72-83. doi: 10.1097/00012272-199203000-00010 [published Online First: 1992/03/01]
13. Dreyfus HL. Being-in-the-world: A commentary on Heidegger's Being and Time. Cambridge: The MIT Press 1991.
14. Dahlberg K. The essence of essences – the search for meaning structures in phenomenological analysis of lifeworld phenomena. *International journal of qualitative studies on health and well-being* 2006;1(1):11-19. doi: 10.1080/17482620500478405



15. StatisticsSierraLeone. 2015 Sierra Leone Population and Housing Census 2016 [Available from: <https://www.statistics.sl/index.php/census/census-2015.html>] accessed November 12 2020.
16. Lamunu M, Olu OO, Bangura J, et al. Epidemiology of Ebola Virus Disease in the Western Area Region of Sierra Leone, 2014-2015. *Frontiers in public health* 2017;5:33. doi: 10.3389/fpubh.2017.00033 [published Online First: 2017/03/18]
17. WHO. Medical doctors per 10,000 population 2021 [Available from: [https://www.who.int/data/gho/data/indicators/indicator-details/GHO/medical-doctors-\(per-10-000-population\)](https://www.who.int/data/gho/data/indicators/indicator-details/GHO/medical-doctors-(per-10-000-population))] accessed December 5 2021.
18. Witter S, Brikci N, Harris T, et al. The free healthcare initiative in Sierra Leone: Evaluating a health system reform, 2010-2015. *The International journal of health planning and management* 2018;33(2):434-48. doi: 10.1002/hpm.2484 [published Online First: 2018/01/13]
19. Government of Sierra Leone. Comprehensive EPI Multi-Year Plan 2017-2021 2016 [Available from: <https://www.gavi.org/sites/default/files/document/2021/cMYP%20Sierra%20Leone%202017-2021.pdf>] accessed December 5 2020.
20. Government of Sierra Leone. Policy for Community Health Workers in Sierra Leone 2012 [Available from: <https://chwcentral.org/wp-content/uploads/2015/01/CHW-Policy-Sierra-Leone.pdf>] accessed December 5 2020.
21. Malterud K, Siersma VD, Guassora AD. Sample Size in Qualitative Interview Studies: Guided by Information Power. *Qualitative health research* 2016;26(13):1753-60. doi: 10.1177/1049732315617444 [published Online First: 2015/11/29]
22. Amin AB, Bednarczyk RA, Ray CE, et al. Association of moral values with vaccine hesitancy. *Nature human behaviour* 2017;1(12):873-80. doi: 10.1038/s41562-017-0256-5 [published Online First: 2017/12/01]
23. Di Pietro ML, Poscia A, Telesman AA, et al. Vaccine hesitancy: parental, professional and public responsibility. *Annali dell'Istituto superiore di sanita* 2017;53(2):157-62. doi: 10.4415/ann\_17\_02\_13 [published Online First: 2017/06/16]
24. Giubilini A, Douglas T, Šavulescu J. The moral obligation to be vaccinated: utilitarianism, contractualism, and collective easy rescue. *Medicine, health care, and philosophy* 2018;21(4):547-60. doi: 10.1007/s11019-018-9829-y [published Online First: 2018/02/13]
25. Bester JC. Measles Vaccination is Best for Children: The Argument for Relying on Herd Immunity Fails. *Journal of bioethical inquiry* 2017;14(3):375-84. doi: 10.1007/s11673-017-9799-4 [published Online First: 2017/08/18]
26. Dawson A. What are the moral obligations of the traveller in relation to vaccination? *Travel medicine and infectious disease* 2007;5(2):90-6. doi: 10.1016/j.tmaid.2006.01.005 [published Online First: 2007/02/15]
27. Omer SB, Salmon DA, Orenstein WA, et al. Vaccine refusal, mandatory immunization, and the risks of vaccine-preventable diseases. *N Engl J Med* 2009;360(19):1981-8. doi: 10.1056/NEJMsa0806477 [published Online First: 2009/05/08]
28. Frew PM, Chung Y, Fisher AK, et al. Parental experiences with vaccine information statements: Implications for timing, delivery, and parent-provider immunization communication. *Vaccine* 2016;34(48):5840-44. doi: 10.1016/j.vaccine.2016.10.026 [published Online First: 2016/10/30]
29. Drezner D, Youngster M, Klainer H, et al. Maternal vaccinations coverage and reasons for non-compliance - a cross-sectional observational study. *BMC pregnancy and childbirth* 2020;20(1):541. doi: 10.1186/s12884-020-03243-w [published Online First: 2020/09/18]
30. Wiley KE, Massey PD, Cooper SC, et al. Pregnant women's intention to take up a post-partum pertussis vaccine, and their willingness to take up the vaccine while pregnant: a cross sectional survey. *Vaccine* 2013;31(37):3972-8. doi: 10.1016/j.vaccine.2013.06.015 [published Online First: 2013/06/20]
31. Makwe CC, Anorlu RI. Knowledge of and attitude toward human papillomavirus infection and vaccines among female nurses at a tertiary hospital in Nigeria. *International journal of women's health* 2011;3:313-7. doi: 10.2147/ijwh.S22792 [published Online First: 2011/10/07]

- 1  
2  
3 32. Foss HS, Oldervoll A, Fretheim A, et al. Communication around HPV vaccination for adolescents in  
4 low- and middle-income countries: a systematic scoping overview of systematic reviews.  
5 *Systematic reviews* 2019;8(1):190. doi: 10.1186/s13643-019-1100-y [published Online First:  
6 2019/08/03]
- 7 33. Sodeinde K, Amoran O, Abiodun O, et al. A rural/urban comparison of paternal involvement in  
8 childhood immunisation in Ogun Central Senatorial District, Nigeria. *The Nigerian postgraduate  
9 medical journal* 2020;27(4):336-42. doi: 10.4103/npmj.npmj\_101\_20 [published Online First:  
10 2020/11/07]
- 11 34. Brughra RF, Kevany JP, Swan AV. An investigation of the role of fathers in immunization uptake. *Int  
12 J Epidemiol* 1996;25(4):840-5. doi: 10.1093/ije/25.4.840 [published Online First: 1996/08/01]
- 13 35. Allport BS, Johnson S, Aqil A, et al. Promoting Father Involvement for Child and Family Health.  
14 *Acad Pediatr* 2018;18(7):746-53. doi: 10.1016/j.acap.2018.03.011 [published Online First:  
15 2018/04/14]
- 16 36. Dube E, Laberge C, Guay M, et al. Vaccine hesitancy: an overview. *Human vaccines &  
17 immunotherapeutics* 2013;9(8):1763-73. doi: 10.4161/hv.24657 [published Online First:  
18 2013/04/16]
- 19 37. Larson HJ, Jarrett C, Eckersberger E, et al. Understanding vaccine hesitancy around vaccines and  
20 vaccination from a global perspective: a systematic review of published literature, 2007-2012.  
21 *Vaccine* 2014;32(19):2150-9. doi: 10.1016/j.vaccine.2014.01.081 [published Online First:  
22 2014/03/07]
- 23 38. Du F, Chantler T, Francis MR, et al. The determinants of vaccine hesitancy in China: A cross-  
24 sectional study following the Changchun Changsheng vaccine incident. *Vaccine*  
25 2020;38(47):7464-71. doi: 10.1016/j.vaccine.2020.09.075 [published Online First: 2020/10/13]
- 26 39. WHO. Adverse events following immunization (AEFI) 2021 [Available from:  
27 [https://www.who.int/immunization/monitoring\\_surveillance/who-immuniz.pdf](https://www.who.int/immunization/monitoring_surveillance/who-immuniz.pdf) accessed February  
28 18 2021.
- 29 40. WHO. Vaccine safety basics e-learning course 2021 [Available from: [https://vaccine-safety-  
30 training.org/simplified-and-key-messages.html](https://vaccine-safety-training.org/simplified-and-key-messages.html) accessed February 19 2021.
- 31 41. UNICEF. Sierra Leone Multiple Indicators Cluster Survey 2017 [Available from:  
32 [https://mics.unicef.org/news\\_entries/106/SIERRA-LEONE-2017-MICS-RELEASED](https://mics.unicef.org/news_entries/106/SIERRA-LEONE-2017-MICS-RELEASED) accessed  
33 January 21 2021.
- 34 42. Abbas K, Procter SR, van Zandvoort K, et al. Routine childhood immunisation during the COVID-19  
35 pandemic in Africa: a benefit-risk analysis of health benefits versus excess risk of SARS-CoV-2  
36 infection. *Lancet Glob Health* 2020;8(10):e1264-e72. doi: 10.1016/s2214-109x(20)30308-9  
37 [published Online First: 2020/07/21]
- 38  
39  
40  
41  
42  
43  
44  
45  
46  
47  
48  
49  
50  
51  
52  
53  
54  
55  
56  
57  
58  
59  
60

**Table 1. Enablers of childhood vaccination—Western Area Urban, Sierra Leone, 2018**

| Meaning unit                                           | Category                                    | Sub-themes                                  | Theme                             |
|--------------------------------------------------------|---------------------------------------------|---------------------------------------------|-----------------------------------|
| Responsibility to ensure full vaccination              | Parental responsibility                     | Emotional enablers of childhood vaccination | Enablers of childhood vaccination |
| Obligation to do the right thing                       |                                             |                                             |                                   |
| Immunisation as a requirement                          | Wanting a ‘strong and healthy baby’         |                                             |                                   |
| Immunisation is important for baby’s health            |                                             |                                             |                                   |
| Wanting ‘strong baby’                                  |                                             |                                             |                                   |
| ‘Health is wealth’                                     | Parental anticipation of reciprocal benefit |                                             |                                   |
| Defaulting on vaccination risks baby’s life            |                                             |                                             |                                   |
| Vaccination benefits the parent later in life          | Diversity of immunisation reminders         | Practical enablers of childhood vaccination |                                   |
| Taking care of parents when old                        |                                             |                                             |                                   |
| Immunisation card is important                         | Information access and information trust    |                                             |                                   |
| Campaign as reminder                                   |                                             |                                             |                                   |
| Reminders by health workers at vaccination visit       |                                             |                                             |                                   |
| Husband as reminder                                    |                                             |                                             |                                   |
| Immunisation card as reminder                          | Getting fathers more involved               |                                             |                                   |
| Other family member as reminder                        |                                             |                                             |                                   |
| Nurses should lead                                     |                                             |                                             |                                   |
| Nurses more trusted than CHWs                          |                                             |                                             |                                   |
| Same information from different sources                |                                             |                                             |                                   |
| Immunisation promotion through radio/tv                | Positive experiences with health worker     |                                             |                                   |
| Immunisation promotion by health workers               |                                             |                                             |                                   |
| Immunisation promotion through leaders                 |                                             |                                             |                                   |
| Immunisation promotion by NGOs                         |                                             |                                             |                                   |
| Mothers take the child to the clinic                   | Post-vaccination information sharing        |                                             |                                   |
| Fathers rarely involved                                |                                             |                                             |                                   |
| Father received an award for involvement               |                                             |                                             |                                   |
| Cordial relationship with nurses                       |                                             |                                             |                                   |
| Good care by nurses                                    |                                             |                                             |                                   |
| HWs encourage seeking care at HF                       |                                             |                                             |                                   |
| Giving money to health worker as token of appreciation | Post-vaccination information sharing        |                                             |                                   |
| Husband asking about the visit                         |                                             |                                             |                                   |
| Informing husband of next visit                        |                                             |                                             |                                   |
| Telling husband about visit expenses                   |                                             |                                             |                                   |
| Immunisation is a “learning process”                   |                                             |                                             |                                   |
| Sharing experiences with neighbours or friends         | Post-vaccination information sharing        |                                             |                                   |
| Other family members asking about the visit            |                                             |                                             |                                   |

**Table 2. Barriers related to childhood vaccination–Western Area Urban, Sierra Leone, 2018**

| Meaning unit                                     | Category                                            | Sub-themes                               | Themes                                    |
|--------------------------------------------------|-----------------------------------------------------|------------------------------------------|-------------------------------------------|
| Asking husband for money                         | Preparing for the journey and getting to the clinic | Practical constraints                    | Barriers related to childhood vaccination |
| Juggling different household duties              |                                                     |                                          |                                           |
| Competing priorities                             |                                                     |                                          |                                           |
| Time taken to get to the clinic                  |                                                     |                                          |                                           |
| Wasting time at the clinic                       |                                                     |                                          |                                           |
| Rush to arrive first and seen first              |                                                     |                                          |                                           |
| Crowding at the clinic                           |                                                     |                                          |                                           |
| Very long wait at larger health facilities       |                                                     |                                          |                                           |
| Spent a day and nothing happened                 |                                                     |                                          |                                           |
| Wasting caregiver's time                         |                                                     |                                          |                                           |
| Not respecting caregivers                        | Feeling disrespected by health workers              | Negative experiences with health workers |                                           |
| Shouting at caregivers                           |                                                     |                                          |                                           |
| Paying for the card                              | Monetary expectations                               |                                          |                                           |
| Paying for free drugs                            |                                                     |                                          |                                           |
| Paying for weighing                              |                                                     |                                          |                                           |
| Payment as punishment                            |                                                     |                                          |                                           |
| Bad care without payment                         |                                                     |                                          |                                           |
| Health workers should stop demanding money       |                                                     |                                          |                                           |
| Health worker don't appreciate less than Le 2000 |                                                     |                                          |                                           |
| Health workers withholding free drugs            |                                                     |                                          |                                           |
| Baby crying throughout the night                 |                                                     | Vaccine side effects                     | Safety concerns                           |
| Baby gets 'lazy' for few hours                   |                                                     |                                          |                                           |
| Fever in baby                                    |                                                     |                                          |                                           |
| Swelling at injection site                       |                                                     |                                          |                                           |
| Side effects only for some vaccines              |                                                     |                                          |                                           |
| Rub onion on swollen injection site              |                                                     |                                          |                                           |
| Avoiding abnormalities from vaccine              |                                                     |                                          |                                           |
| Afraid of vaccine side effects                   |                                                     |                                          |                                           |

**Table 3. Recommendations to improve childhood vaccination– Western Area Urban, Sierra Leone, 2018**

| Meaning unit                             | Category                                    | Sub-theme                                                               | Theme                                            |
|------------------------------------------|---------------------------------------------|-------------------------------------------------------------------------|--------------------------------------------------|
| Continue campaigns at repeated intervals | Improving vaccination processes and systems | Caregivers want improved vaccination processes, systems, and engagement | Recommendations to improve childhood vaccination |
| Do not rely on campaigns alone           |                                             |                                                                         |                                                  |
| Provision of incentives for caregivers   |                                             |                                                                         |                                                  |
| Concentrate on defaulters                |                                             |                                                                         |                                                  |
| Compensation/incentives for nurses       |                                             |                                                                         |                                                  |
| Being considerate towards health workers |                                             |                                                                         |                                                  |
| Employ more staff                        |                                             |                                                                         |                                                  |
| Stop demanding money                     | Engaging communities to                     |                                                                         |                                                  |
| Promote consequences of not vaccinating  |                                             |                                                                         |                                                  |
| Peer-to-peer promotion of immunisation   |                                             |                                                                         |                                                  |

|    |                                              |                          |  |  |
|----|----------------------------------------------|--------------------------|--|--|
| 1  | Inform about importance of immunisation      | boost vaccine confidence |  |  |
| 2  | Address 'stubborn' caregivers                |                          |  |  |
| 3  | Engage caregivers who do not want injections |                          |  |  |
| 4  |                                              |                          |  |  |
| 5  |                                              |                          |  |  |
| 6  |                                              |                          |  |  |
| 7  |                                              |                          |  |  |
| 8  |                                              |                          |  |  |
| 9  |                                              |                          |  |  |
| 10 |                                              |                          |  |  |
| 11 |                                              |                          |  |  |
| 12 |                                              |                          |  |  |
| 13 |                                              |                          |  |  |
| 14 |                                              |                          |  |  |
| 15 |                                              |                          |  |  |
| 16 |                                              |                          |  |  |
| 17 |                                              |                          |  |  |
| 18 |                                              |                          |  |  |
| 19 |                                              |                          |  |  |
| 20 |                                              |                          |  |  |
| 21 |                                              |                          |  |  |
| 22 |                                              |                          |  |  |
| 23 |                                              |                          |  |  |
| 24 |                                              |                          |  |  |
| 25 |                                              |                          |  |  |
| 26 |                                              |                          |  |  |
| 27 |                                              |                          |  |  |
| 28 |                                              |                          |  |  |
| 29 |                                              |                          |  |  |
| 30 |                                              |                          |  |  |
| 31 |                                              |                          |  |  |
| 32 |                                              |                          |  |  |
| 33 |                                              |                          |  |  |
| 34 |                                              |                          |  |  |
| 35 |                                              |                          |  |  |
| 36 |                                              |                          |  |  |
| 37 |                                              |                          |  |  |
| 38 |                                              |                          |  |  |
| 39 |                                              |                          |  |  |
| 40 |                                              |                          |  |  |
| 41 |                                              |                          |  |  |
| 42 |                                              |                          |  |  |
| 43 |                                              |                          |  |  |
| 44 |                                              |                          |  |  |
| 45 |                                              |                          |  |  |
| 46 |                                              |                          |  |  |
| 47 |                                              |                          |  |  |
| 48 |                                              |                          |  |  |
| 49 |                                              |                          |  |  |
| 50 |                                              |                          |  |  |
| 51 |                                              |                          |  |  |
| 52 |                                              |                          |  |  |
| 53 |                                              |                          |  |  |
| 54 |                                              |                          |  |  |
| 55 |                                              |                          |  |  |
| 56 |                                              |                          |  |  |
| 57 |                                              |                          |  |  |
| 58 |                                              |                          |  |  |
| 59 |                                              |                          |  |  |
| 60 |                                              |                          |  |  |

For peer review only

## COREQ (COnsolidated criteria for REporting Qualitative research) Checklist

A checklist of items that should be included in reports of qualitative research. You must report the page number in your manuscript where you consider each of the items listed in this checklist. If you have not included this information, either revise your manuscript accordingly before submitting or note N/A.

| Topic                                          | Item No. | Guide Questions/Description                                                                                                                              | Reported on Page No. |
|------------------------------------------------|----------|----------------------------------------------------------------------------------------------------------------------------------------------------------|----------------------|
| <b>Domain 1: Research team and reflexivity</b> |          |                                                                                                                                                          |                      |
| <i>Personal characteristics</i>                |          |                                                                                                                                                          |                      |
| Interviewer/facilitator                        | 1        | Which author/s conducted the interview or focus group?                                                                                                   |                      |
| Credentials                                    | 2        | What were the researcher's credentials? E.g. PhD, MD                                                                                                     |                      |
| Occupation                                     | 3        | What was their occupation at the time of the study?                                                                                                      |                      |
| Gender                                         | 4        | Was the researcher male or female?                                                                                                                       |                      |
| Experience and training                        | 5        | What experience or training did the researcher have?                                                                                                     |                      |
| <i>Relationship with participants</i>          |          |                                                                                                                                                          |                      |
| Relationship established                       | 6        | Was a relationship established prior to study commencement?                                                                                              |                      |
| Participant knowledge of the interviewer       | 7        | What did the participants know about the researcher? e.g. personal goals, reasons for doing the research                                                 |                      |
| Interviewer characteristics                    | 8        | What characteristics were reported about the interviewer/facilitator? e.g. Bias, assumptions, reasons and interests in the research topic                |                      |
| <b>Domain 2: Study design</b>                  |          |                                                                                                                                                          |                      |
| <i>Theoretical framework</i>                   |          |                                                                                                                                                          |                      |
| Methodological orientation and Theory          | 9        | What methodological orientation was stated to underpin the study? e.g. grounded theory, discourse analysis, ethnography, phenomenology, content analysis |                      |
| <i>Participant selection</i>                   |          |                                                                                                                                                          |                      |
| Sampling                                       | 10       | How were participants selected? e.g. purposive, convenience, consecutive, snowball                                                                       |                      |
| Method of approach                             | 11       | How were participants approached? e.g. face-to-face, telephone, mail, email                                                                              |                      |
| Sample size                                    | 12       | How many participants were in the study?                                                                                                                 |                      |
| Non-participation                              | 13       | How many people refused to participate or dropped out? Reasons?                                                                                          |                      |
| <i>Setting</i>                                 |          |                                                                                                                                                          |                      |
| Setting of data collection                     | 14       | Where was the data collected? e.g. home, clinic, workplace                                                                                               |                      |
| Presence of non-participants                   | 15       | Was anyone else present besides the participants and researchers?                                                                                        |                      |
| Description of sample                          | 16       | What are the important characteristics of the sample? e.g. demographic data, date                                                                        |                      |
| <i>Data collection</i>                         |          |                                                                                                                                                          |                      |
| Interview guide                                | 17       | Were questions, prompts, guides provided by the authors? Was it pilot tested?                                                                            |                      |
| Repeat interviews                              | 18       | Were repeat interviews carried out? If yes, how many?                                                                                                    |                      |
| Audio/visual recording                         | 19       | Did the research use audio or visual recording to collect the data?                                                                                      |                      |
| Field notes                                    | 20       | Were field notes made during and/or after the interview or focus group?                                                                                  |                      |
| Duration                                       | 21       | What was the duration of the interviews or focus group?                                                                                                  |                      |
| Data saturation                                | 22       | Was data saturation discussed?                                                                                                                           |                      |
| Transcripts returned                           | 23       | Were transcripts returned to participants for comment and/or                                                                                             |                      |

| Topic                                  | Item No. | Guide Questions/Description                                                                                                        | Reported on Page No. |
|----------------------------------------|----------|------------------------------------------------------------------------------------------------------------------------------------|----------------------|
|                                        |          | correction?                                                                                                                        |                      |
| <b>Domain 3: analysis and findings</b> |          |                                                                                                                                    |                      |
| <i>Data analysis</i>                   |          |                                                                                                                                    |                      |
| Number of data coders                  | 24       | How many data coders coded the data?                                                                                               |                      |
| Description of the coding tree         | 25       | Did authors provide a description of the coding tree?                                                                              |                      |
| Derivation of themes                   | 26       | Were themes identified in advance or derived from the data?                                                                        |                      |
| Software                               | 27       | What software, if applicable, was used to manage the data?                                                                         |                      |
| Participant checking                   | 28       | Did participants provide feedback on the findings?                                                                                 |                      |
| <i>Reporting</i>                       |          |                                                                                                                                    |                      |
| Quotations presented                   | 29       | Were participant quotations presented to illustrate the themes/findings?<br>Was each quotation identified? e.g. participant number |                      |
| Data and findings consistent           | 30       | Was there consistency between the data presented and the findings?                                                                 |                      |
| Clarity of major themes                | 31       | Were major themes clearly presented in the findings?                                                                               |                      |
| Clarity of minor themes                | 32       | Is there a description of diverse cases or discussion of minor themes?                                                             |                      |

Developed from: Tong A, Sainsbury P, Craig J. Consolidated criteria for reporting qualitative research (COREQ): a 32-item checklist for interviews and focus groups. *International Journal for Quality in Health Care*. 2007. Volume 19, Number 6: pp. 349 – 357

**Once you have completed this checklist, please save a copy and upload it as part of your submission. DO NOT include this checklist as part of the main manuscript document. It must be uploaded as a separate file.**

# BMJ Open

## Qualitative assessment of caregiver experiences when navigating childhood immunisation in urban communities in Sierra Leone

|                                 |                                                                                                                                                                                                                                                                                                                                                                                                                                                                                                                                                                                                                                                                                    |
|---------------------------------|------------------------------------------------------------------------------------------------------------------------------------------------------------------------------------------------------------------------------------------------------------------------------------------------------------------------------------------------------------------------------------------------------------------------------------------------------------------------------------------------------------------------------------------------------------------------------------------------------------------------------------------------------------------------------------|
| Journal:                        | <i>BMJ Open</i>                                                                                                                                                                                                                                                                                                                                                                                                                                                                                                                                                                                                                                                                    |
| Manuscript ID                   | bmjopen-2021-058203.R2                                                                                                                                                                                                                                                                                                                                                                                                                                                                                                                                                                                                                                                             |
| Article Type:                   | Original research                                                                                                                                                                                                                                                                                                                                                                                                                                                                                                                                                                                                                                                                  |
| Date Submitted by the Author:   | 30-Mar-2022                                                                                                                                                                                                                                                                                                                                                                                                                                                                                                                                                                                                                                                                        |
| Complete List of Authors:       | Jalloh, Mohamed; Centers for Disease Control and Prevention, Center for Public Health<br>Patel, Palak; Centers for Disease Control and Prevention; Oak Ridge Institute for Science and Education,<br>Sutton, Roberta; ICAP at Columbia University<br>Kulkarni, Shibani; Centers for Disease Control and Prevention; Oak Ridge Institute for Science and Education,<br>Toure, Mame; ICAP at Columbia University<br>Wiley, Kerrie; The University of Sydney, School of Public Health<br>Sessay, Tom; Sierra Leone Ministry of Health and Sanitation<br>Lahuerta, Maria; ICAP at Columbia University; Columbia University Mailman School of Public Health, Department of Epidemiology |
| <b>Primary Subject Heading</b>: | Public health                                                                                                                                                                                                                                                                                                                                                                                                                                                                                                                                                                                                                                                                      |
| Secondary Subject Heading:      | Qualitative research, Public health, Health services research, Global health                                                                                                                                                                                                                                                                                                                                                                                                                                                                                                                                                                                                       |
| Keywords:                       | Public health < INFECTIOUS DISEASES, Community child health < PAEDIATRICS, Child protection < PAEDIATRICS                                                                                                                                                                                                                                                                                                                                                                                                                                                                                                                                                                          |
|                                 |                                                                                                                                                                                                                                                                                                                                                                                                                                                                                                                                                                                                                                                                                    |

SCHOLARONE™  
Manuscripts





I, the Submitting Author has the right to grant and does grant on behalf of all authors of the Work (as defined in the below author licence), an exclusive licence and/or a non-exclusive licence for contributions from authors who are: i) UK Crown employees; ii) where BMJ has agreed a CC-BY licence shall apply, and/or iii) in accordance with the terms applicable for US Federal Government officers or employees acting as part of their official duties; on a worldwide, perpetual, irrevocable, royalty-free basis to BMJ Publishing Group Ltd ("BMJ") its licensees and where the relevant Journal is co-owned by BMJ to the co-owners of the Journal, to publish the Work in this journal and any other BMJ products and to exploit all rights, as set out in our [licence](#).

The Submitting Author accepts and understands that any supply made under these terms is made by BMJ to the Submitting Author unless you are acting as an employee on behalf of your employer or a postgraduate student of an affiliated institution which is paying any applicable article publishing charge ("APC") for Open Access articles. Where the Submitting Author wishes to make the Work available on an Open Access basis (and intends to pay the relevant APC), the terms of reuse of such Open Access shall be governed by a Creative Commons licence – details of these licences and which [Creative Commons](#) licence will apply to this Work are set out in our licence referred to above.

Other than as permitted in any relevant BMJ Author's Self Archiving Policies, I confirm this Work has not been accepted for publication elsewhere, is not being considered for publication elsewhere and does not duplicate material already published. I confirm all authors consent to publication of this Work and authorise the granting of this licence.

1  
2  
3 TITLE PAGE  
4  
5

6  
7 **Title**

8 Qualitative assessment of caregiver experiences when navigating childhood immunisation in urban  
9 communities in Sierra Leone  
10  
11

12  
13 **Authors**

14 Mohamed F. Jalloh<sup>1</sup>, Palak Patel<sup>1,2</sup>, Roberta Sutton<sup>3</sup>, Shibani Kulkarni<sup>1,2</sup>, Mame Toure<sup>4</sup>, Kerrie Wiley<sup>5</sup>,  
15 Tom Sesay,<sup>6</sup> Maria Lahuerta<sup>3,7</sup>, Sierra Leone Urban Immunisation Needs Assessment Group  
16  
17

18  
19 **Affiliations**

- 20  
21 1. Immunisation Systems Branch, Global Immunisation Division, Centres for Disease Control and  
22 Prevention, Atlanta, Georgia, USA  
23  
24 2. Oak Ridge Institute for Science and Education's Research Participation Program, Centres for  
25 Disease Control and Prevention, Atlanta, Georgia, USA  
26  
27 3. ICAP at Columbia University, Mailman School of Public Health, New York, New York, USA  
28  
29 4. ICAP at Columbia University, Sierra Leone Country Office, Freetown, Sierra Leone  
30  
31 5. School of Public Health, The University of Sydney, Sydney, NSW, Australia  
32  
33 6. Child Health Programme, Ministry of Health and Sanitation, Freetown, Sierra Leone  
34  
35 7. Department of Epidemiology, Mailman School of Public Health, New York, New York, USA  
36

37 **Corresponding author**

38 Mohamed F. Jalloh, PhD, MPH

39 Immunisation systems Branch, Global Immunisation Division, U.S. Centres for Disease Control and  
40 Prevention, Atlanta, Georgia, USA. Email: [yum8@cdc.gov](mailto:yum8@cdc.gov). Tel: +1 (404) 401-2773.  
41  
42  
43  
44  
45

46 **Wordcount**

47 Abstract: 239 words; Manuscript: 5438 words  
48  
49  
50

51 **Keywords**

52 Vaccination, immunisation, vaccine, hesitancy, demand, caregiver, experience, qualitative, methodology,  
53 interpretative phenomenology, urban, slum, Sierra Leone  
54  
55  
56  
57

## ABSTRACT

**Objective:** To gain in-depth understanding of the caregiver experience when navigating urban immunisation services for their children.

**Design:** An exploratory qualitative assessment comprising 16 in-depth interviews using an interpretative phenomenology approach.

**Setting:** Caregivers were purposively recruited from slums (n=8) and other urban communities (n=8) in the capital city of Sierra Leone.

**Participants:** Caregivers of children ages 6 to 36 months old who were fully vaccinated (n=8) or under-vaccinated (n=8).

**Results:** Emotional enablers of vaccination were evident in caregivers' sense of parental obligation to their children while also anticipating reciprocal benefits in children's ability to take care of the parents later in life. Practical enablers were found in the diversity of immunization reminders, information access, information trust, getting fathers more involved, positive experiences with health workers, and post-vaccination information sharing in the community. Underlying barriers to childhood vaccination were due to practical constraints such as overcrowding and long waiting times at the clinic, feeling disrespected by health workers, expecting to give money to health workers for free services, and fear of serious vaccine side effects. To improve vaccination outcomes, caregivers desired more convenient and positive clinic experiences and deeper community engagement.

**Conclusions:** Health system interventions, community engagement, and vaccination outreach need to be tailored to for urban settings. Vaccine communication efforts may resonate more strongly with caregivers when vaccination is framed both around parental responsibilities to do the right thing for the child and the future benefits to the parent.

## STRENGTHS AND LIMITATIONS OF THIS STUDY

- This qualitative assessment describes the caregiver experience in navigating childhood immunisation services in urban settings in a low-income country to gain insights for improving vaccination outcomes.
- The sample comprised of caregivers of fully vaccinated and under-vaccinated children who were purposively recruited to help understand how the two outcomes may be shaped by differences in the caregiver experiences.
- The rarity of experiencing serious side effects among children in our sample limits the ability to have a rich understanding of such experiences on subsequent vaccination uptake.

## 1. Introduction

There have been efforts to understand urban immunisation challenges in low- and middle-income countries (LMICs), including in urban slums and informal settlements.<sup>1</sup> Assessment of immunisation barriers in urban areas in LMICs identified a range of practical and social issues, such as population mobility, inaccurate denominators of children due to out-of-date population estimates and poorly defined geographic catchment areas, the lack of trust in the health system among vulnerable groups, overburdened health facilities, and weak community engagement and outreach.<sup>2</sup>

In Sierra Leone, the 2014-2016 Ebola epidemic disrupted the delivery of essential health services, including immunisation services, especially in urban areas.<sup>3,4</sup> Barriers that affected routine health services included the fear of contracting Ebola in health facilities, stigmatization of health workers, and shifting of resources to the epidemic.<sup>5</sup> As the Ebola epidemic waned, measles outbreaks became more frequent due to the decline in measles vaccination.<sup>6</sup> In the aftermath of the Ebola epidemic, the Government of Sierra Leone and its partners made major investments to rebuild health systems and restore public confidence in the health system.<sup>7,8</sup> However, challenges in access to and the uptake of immunisation services persist, including in urban areas.<sup>9</sup>

The United Nations Children's Fund (UNICEF) and partners developed the Caregiver Journey Framework to guide countries in understanding the experiences, processes, and structures that shape how caregivers seek and receive health services for their children, including essential immunisation.<sup>10</sup> In 2018, we operationalized the Caregiver Journey Framework through a qualitative approach in the Western Area Urban district (WAU) in Sierra Leone. Implementation experiences from operationalizing the framework in the context of urban immunization has been described elsewhere.<sup>11</sup> The framework was operationalized into several domains to understand decision-making and preparation for vaccination visits, making the journey to clinics, experiences during vaccination visits, and post-vaccination experiences. Building on these domains, we aimed to describe the real-world experiences of caregivers of vaccine-eligible children as they navigate urban immunisation services in Sierra Leone to identify vaccination enablers and barriers.

## 2. Methods

We aimed to understand how household dynamics, social factors, and formal healthcare delivery systems influence childhood immunisation uptake via the lens of primary caregivers of vaccine-eligible children in urban settings in Sierra Leone. Hence, we developed the Immunisation Caregiver Journey Interviews

(ICJI) approach<sup>11</sup> based on the Caregiver Journey Framework using principles of interpretative phenomenology,<sup>12 13</sup> which focuses on elucidating the essence of common experiences to explain, interpret, and make sense of a phenomenon.<sup>14</sup> We used a phenomenological approach to explore the lifeworld of caregivers in how they navigate childhood immunisation for their children repeatedly in low-resource, urban settings.<sup>11</sup> A semi-structured ICJI guide was used to explore the following domains: Decision-making and preparation, making the journey, experiences during vaccination visit, post-vaccination experiences, intentions to return, and perceptions of immunisation promotion activities in the community.

## 2.1. Setting

The WAU district in Sierra Leone comprises most of the capital city of Freetown with approximately 1.2 million inhabitants.<sup>15</sup> The district was heavily affected by the Ebola epidemic, partly due to high population movements and crowded housing conditions.<sup>16</sup> On average, there is less than one medical doctor per 10,000 population.<sup>17</sup> The Government of Sierra Leone introduced the Free Health Care Initiative in 2010 to remove cost barriers for essential health services for pregnant and lactating mothers and under-five children.<sup>18</sup> Childhood immunisation services are delivered through the Expanded Program on Immunisation using fixed sites that are supplemented by community outreach services to be conducted five times monthly.<sup>19</sup> Each catchment community has 10 community health workers (CHWs) who support the promotion of health services on a voluntary basis.<sup>20</sup> A coverage survey in 2019 estimated 86% coverage for three doses of diphtheria-pertussis-tetanus (DPT) vaccine in slums and 92% coverage in non-slum urban areas in the WAU district. However, coverage of the second dose of measles-containing vaccine was very low in the district (33% in slums and 29% in non-slum urban areas).<sup>9</sup>

## 2.2. Sampling and data collection

The sample size for this qualitative assessment was guided by an approach that focuses on *qualitative information power*.<sup>21</sup> The concept of information power posits that researchers should determine the sample size in a qualitative assessment based on the aim (narrow versus broad), sample specificity (targeting specific group versus multiple groups), theoretical underpinning (application of theory or no theory), quality of dialogue (weak or strong), and analysis strategy (within-case only or cross-case). Sample size burden increases when the aim is broad, multiple groups are targeted in the sample, the assessment is theory-driven, the quality of the dialogue is weak, and transcripts are analysed using cross-case analysis. In our assessment, the aim was narrow, the sample targeted a specific group, we applied theory to guide the assessment, the transcripts contained rich information, and we conducted both within-case and cross-case analyses. Against these considerations, we interviewed 16 caregivers and

1  
2  
3 progressively reviewed debrief notes from the interviews to assess information power. In analysing the  
4 transcripts, we concluded that we reached saturation with the 16 interviews and likely could have stopped  
5 interviewing after the 12th interview.  
6  
7

8  
9 We purposively recruited the caregivers from eight communities in the WAU district, four of which were  
10 slums and four were other urban areas in the district to maximize variation in the sample. Within each  
11 community, two caregivers of children ages 6-36 months were selected to capture a breadth of  
12 experiences of caregivers with vaccine eligible children—one whose child was fully vaccinated for age  
13 and another whose child had missed at least one scheduled vaccination visit. CHWs supported data  
14 collection teams in visiting households to identify and recruit eligible caregivers in the selected  
15 communities. Snowball sampling was used as a secondary sampling strategy when the first identified  
16 caregiver declined to interview but knew of other caregivers in the community with vaccine-eligible  
17 children or when CHWs were only successful in identifying just one eligible caregiver. In this form of  
18 snowball sampling, a previously visited household with an eligible child would point data collectors to  
19 other households with potentially eligible children (i.e., vaccine eligible children). Data collectors visited  
20 such households to screen for eligibility. This process continued until two caregivers of eligible children  
21 were successfully recruited and interviewed from a particular community. Interviews were conducted on  
22 the same of day of recruitment after obtaining informed consent from the caregiver.  
23  
24  
25  
26  
27  
28  
29  
30  
31  
32

33 We recruited data collectors (interviewers and notetakers) who were fluent in English and the  
34 predominant local language in the WAU district (Krio). The data collectors had post-secondary  
35 educational training in social sciences and were experienced in conducting qualitative data collection in  
36 Sierra Leone. Two behavioural scientists trained the facilitators for a week on the assessment protocol.  
37 One of the trainers was from Sierra Leone and had experience conducting social science research in Sierra  
38 Leone. During the training, the English version of the guide was translated into Krio by locally hired staff  
39 together with the facilitators and trainer. The data collectors were trained on how to probe on the spot to  
40 obtain additional pertinent information from caregivers. Data collection occurred in August–September  
41 2018. All interviews were audio-recorded with permission from participants; they were then transcribed  
42 and translated into English by the local team. Interviews lasted about an hour on average and were  
43 conducted in the vicinity of the homes of the caregivers. Data collection teams were trained on choosing  
44 suitable interview locations to enable caregivers to speak freely. The facilitators conducted debriefing  
45 sessions immediately after each interview to make note of key experiences and observations. The  
46 debriefing notes were not part of the formal analysis. However, during the field work, the debriefing notes  
47 were used to progressively assess data saturation and to identify key insights emerging from the  
48  
49  
50  
51  
52  
53  
54  
55  
56  
57

1  
2  
3 interviews. We used the insights from the debrief notes to develop a preliminary report that was mostly in  
4 a descriptive, narrative form. The de-identified preliminary report was shared with the Sierra Leone  
5 Ministry of Health and Sanitation. We have previously documented practical lessons learned from  
6 implementing the assessment in Sierra Leone.<sup>11</sup>  
7  
8  
9

### 10 11 **2.3. Data analysis**

12 Two analysts (one male, one female) read all transcripts and created analytic memos and then analysed  
13 the transcripts using both within-case and cross-case analysis. In the within-case analysis, we developed a  
14 narrative profile for each caregiver to bring key aspects of their lived experiences to the foreground. In the  
15 initial part of the cross-case analysis, each analyst coded three different transcripts (six total), using an  
16 inductive approach to identify and interpret meaning units within the text. To gain alternative  
17 interpretations of the coded meaning units, three of the coded transcripts were shared with a third  
18 qualitative expert, who was not involved in the previous stages of the assessment, for independent ‘blind’  
19 coding of the transcripts. Feedback from the third analyst was discussed by the two primary analysts and  
20 incorporated into the coding scheme. The analysts used an iterative process to review their codes, discuss  
21 their interpretations of the manifest content, and harmonize the initial set of codes that were used for  
22 coding the remaining manuscripts. NVivo software (QSR International–2018, Version 12) was used for  
23 the final organization and coding of the transcripts. Manifest categories of meaning units were grouped to  
24 reflect latent content that was developed into cross-cutting themes via a consultative process. Throughout  
25 the process, the analysts exercised reflexivity regarding subjective interpretations and iteratively re-  
26 examined the transcripts to identify alternative interpretations until consensus was reached with additional  
27 inputs from the co-authors.  
28  
29  
30  
31  
32  
33  
34  
35  
36  
37  
38  
39

### 40 **2.4. Ethical approval**

41 The assessment was approved by the Sierra Leone Ethics and Scientific Review Committee (SLESRC-  
42 17052018), Columbia University Medical Centre Institutional Review Board (IRB-AAAR9031), and the  
43 Centre for Global Health at the U.S. Centres for Disease Control and Prevention (CGH-2018-184). All  
44 participants provided written informed consent.  
45  
46  
47  
48

### 49 **2.5. Patient and public involvement**

50 No patient involved.  
51  
52  
53  
54

## 55 **3. Results**



1  
2  
3 All respondents were the biological mothers of the sampled children except for one female guardian. The  
4 median age was nine months for the children included in the assessment. At the time of the interviews,  
5 half of the children had missed at least one scheduled vaccine dose. Three themes emerged from the  
6 interviews around vaccination enablers (Table 1), vaccination barriers (Table 2) and direct  
7 recommendation to improve vaccination uptake (Table 3). There were no notable differences in themes  
8 between slums and other urban communities.  
9  
10  
11  
12  
13

### 14 **3.1. Enablers of childhood vaccination (Table 1)**

15  
16 Our analysis identified emotional and practical enablers related to childhood vaccination. Emotional  
17 enablers were evident in how caregivers portrayed their parental obligation to their children, wanting to  
18 do the right thing for their children's health, and anticipating reciprocal benefits in children's ability to  
19 take care of the parents later in life. Practical enablers were the diversity of immunization reminders,  
20 information access, information trust, getting fathers more involved, positive experiences with health  
21 workers, and post-vaccination information sharing at the community level.  
22  
23  
24  
25  
26

#### 27 **3.1.1. Parental responsibility**

28 A sense of parental responsibility was a major motivating factor for caregivers to seek vaccination  
29 services for their children. Caregivers viewed vaccination as 'doing the right thing' for their children.  
30 Even caregivers who had missed scheduled vaccination visits felt responsible for getting their children  
31 caught up with their scheduled vaccine doses, which often required deprioritizing other income-  
32 generating activities.  
33  
34  
35

36 *"It is my duty to take my baby to the hospital for immunisation. It is my responsibility as [a]*  
37 *mother to ensure that my baby completes the rounds of immunisation without defaulting."* –

38  
39 Caregiver whose child had missed a scheduled vaccination  
40  
41  
42

#### 43 **3.1.2. Wanting a strong and healthy baby**

44 In addition to the affective responses regarding a sense of duty to the child, appreciating the overall health  
45 benefits of vaccination to their children was another major driving force in motivating caregivers to seek  
46 vaccination services. Caregivers consistently expressed that immunisation has essential health benefits to  
47 the child and that missing scheduled vaccination would 'risk the baby's life.' Moreover, they valued  
48 having a 'strong and healthy baby' and felt that completing the vaccination schedule would positively  
49 impact the baby's health.  
50  
51  
52  
53  
54  
55  
56  
57  
58  
59  
60

1  
2  
3 *“I think [the] vaccine is good for our children. It is important and it helps to build their immune*  
4 *system to keep them strong and healthy; it fights against many things in the body...”* – Caregiver  
5 whose child was fully vaccinated  
6  
7

### 9 **3.1.3. Parental anticipation of reciprocal benefit**

11 Perceptions of vaccination benefits went beyond the direct health benefits to children and extended into  
12 domains of benefit to the parent. The notion that vaccinated children will be healthier and in turn live  
13 longer and be able to take care of their parents later in life emerged as a dimension of vaccination benefit  
14 to the parent. This duality of vaccination benefit was grounded in the cultural context of parents expecting  
15 reciprocal care from their children when the parents can no longer care for themselves.  
16  
17

19 *“It is very difficult for me to be absent for immunisation or not to take my baby to the hospital*  
20 *when sick. Sometimes people think I’m mad but I’m not. I’m trying to bring up my children in a*  
21 *way that they will benefit me when I’m old.”* – Caregiver whose child had missed a scheduled  
22 vaccination  
23  
24

### 27 **3.1.4. Diversity of immunisation reminders**

28 Caregivers were exposed to numerous reminders and cues to vaccinate their children, including  
29 information from the immunisation cards, health workers, community campaigns, and family members.  
30 However, the child’s immunisation card stood out as the most important reminder that caregivers and  
31 families relied on to remember the dates of the scheduled vaccination visits.  
32  
33

35 *“I do remind myself because they [health workers] will write at the back of the immunisation*  
36 *card the date for the next visit. The immunisation card will tell you the date for the next visit.* –  
37 Caregiver whose child had missed a scheduled vaccination  
38  
39  
40

41 In addition, community outreach campaigns and announcements in the community were also viewed as  
42 helpful reminders to vaccinate.  
43

44 *“The health workers in this community and the CHWs are doing well as they do go round telling*  
45 *people not to forget to take their babies to the hospital for immunisation.”* – Caregiver whose  
46 child had missed a scheduled vaccination  
47  
48  
49

### 51 **3.1.5. Information access and information trust**

52 Immunisation information sources varied, but caregivers consistently cited health workers as trusted  
53 sources of information. Nurses were more trusted than lay CHWs because caregivers viewed nurses as  
54  
55  
56  
57

1  
2  
3 more knowledgeable. While waiting in line before immunisation services, most caregivers appreciated the  
4 ‘health talk’ they received from nurses who advised on health and immunisation.  
5

6 *“I trust them [nurses] because they are a team of qualified nurses ... Before they come here, they*  
7 *know everything about the vaccines and any implications of the vaccines. They are able to*  
8 *explain more than the CHWs and other community workers in the area. The nurses will tell you*  
9 *more. There are things that the community workers do not know, and they refer you to the*  
10 *nurses.”* – Caregiver whose child was fully vaccinated  
11  
12  
13  
14  
15

### 16 **3.1.6. Getting fathers more involved**

17 Mothers desired greater involvement by the child’s fathers in supporting their children’s vaccination. In  
18 most instances, fathers were rarely involved in taking their children to the vaccination clinic. We  
19 uncovered only two instances when fathers actively supported their children’s vaccination visits. In those  
20 instances, the mothers felt supported, and their children were fully vaccinated. In one situation, a father  
21 that routinely accompanied the child to the vaccination clinic was celebrated by health workers and given  
22 the ‘best father’ award.  
23  
24  
25

26 *“There was [a] time when he [my husband] was given the best father award [at the clinic]*  
27 *because he is always with me at the hospital. That is the name I have also given to my husband.*  
28 *Even when the baby is crying, I will say ‘best father’ take your baby.”* – Caregiver whose child  
29 was fully vaccinated  
30  
31  
32  
33  
34

### 35 **3.1.7. Positive experiences with health workers**

36 During vaccination visits, positive experiences with health workers encouraged caregivers to vaccinate  
37 their children. Positive experiences included having a cordial relationship with the health workers. In  
38 particular, caregivers expressed that the nurses took good care of their children, made them feel  
39 comfortable, and tried to build a good rapport. Some caregivers said they would voluntarily give small  
40 amounts of money to health workers as a token of their appreciation after vaccinating the child.  
41  
42  
43

44 *“...the nurses do encourage you and will make jokes so that you will laugh at the end of the day.*  
45 *There is a lot of fun [interactions], which made some of us forget about our stresses.”* –  
46 Caregiver whose child was fully vaccinated  
47  
48  
49  
50

### 51 **3.1.8. Post-vaccination information sharing**

52 Information exchange at the community level with trusted community members strengthened caregiver  
53 confidence in childhood vaccination. Upon returning home from the vaccination visit, caregivers often  
54 discussed the clinic experience with their spouses, families, and other caregivers in the community. In  
55  
56  
57

1  
2  
3 addition to information obtained from health workers at the clinic, caregivers also sought advice from  
4 other ‘more experienced’ caregivers in the community.

5  
6 *“Most times after immunisation, my baby will run a temperature, but the health workers always*  
7 *provide drugs to counter the fever. We have caregivers in this community with vast knowledge*  
8 *and since this is my first baby, I love to talk to them so that we can share our experiences which*  
9 *will be of advantage to me as I’m very new in the field [of parenting].” –Caregiver whose child*  
10 *was fully vaccinated*  
11  
12  
13

### 14 15 16 **3.2. Barriers related to childhood vaccination (Table 2)**

17 Practical constraints, negative experiences with health workers, and safety concerns were the underlying  
18 barriers to childhood vaccination. Practical constraints included challenges faced when preparing for and  
19 getting to the vaccination clinic and inconveniences encountered at the clinic, such as overcrowding and  
20 long waiting times. Negative experiences among caregivers included feeling disrespected by health  
21 workers while simultaneously expecting to give money to health workers for services that are supposed to  
22 be free of charge. Finally, vaccine side effects led to concerns and fears about vaccine safety.  
23  
24  
25  
26  
27

#### 28 29 **3.2.1. Preparing for the journey and getting to the clinic**

30 Caregivers commonly cited the need to juggle ‘household duties’ and other income-generating activities  
31 when planning the visit as a barrier, especially in the absence of fathers’ involvement in taking the child  
32 to the clinic. In addition, mothers frequently depended on their children’s fathers for financial support to  
33 cover the expenses related to the vaccination clinic visit. Some caregivers recounted needing to travel  
34 long distances up to an hour by foot to get to the vaccination clinic, especially when they could not afford  
35 public transportation.  
36  
37  
38  
39  
40

#### 41 42 **3.2.2. Inconveniences at the clinic**

43 Caregivers anticipated various inconveniences at the vaccination visit. The prolonged time spent waiting  
44 for the child to be vaccinated emerged as a substantial inconvenience that was more pronounced when  
45 seeking immunisation services, especially in larger facilities. Anticipating the long wait, caregivers  
46 usually tried to arrive early at the vaccination site to get seen first. The range of activities involved with  
47 the child health visit prolonged the visit, including weighing the baby as part of growth monitoring and  
48 other health checks.  
49  
50  
51

52 *“It is painful if you waste much time at the health facility because you have other issues to attend*  
53 *to. To avoid that, that is why I always come early to the health facility.” – Caregiver whose child*  
54 *was fully vaccinated*  
55  
56  
57

### 3.2.3. Feeling disrespected by health workers

Caregivers often felt disrespected by health workers during the vaccination visit. A key complaint was that health workers shouted at caregivers and sometimes used vulgar language toward caregivers. In other instances, they complained that some health workers habitually arrived late to the vaccination session, which further prolonged the time caregivers spent waiting.

### 3.2.4. Monetary expectations

Systemically hidden costs generated substantial dissatisfaction among caregivers. Caregivers needed to “shake hands” with health workers at different times of the visit (e.g., first time registering the child to get a card, before entering the facility, and before weighing the baby). Shaking hands implied giving some money during the handshake. Caregivers used the money to ‘fast-track’ their children’s vaccination. The expectations around monetary exchange discouraged caregivers who could not afford to shake hands with health workers.

*“Sometimes if I don’t want to spend much time at the hospital, I will shake the hand of the nurse so that they can fast track the immunisation of my baby. I will give them something like two thousand Leones or whatever I have with me at that moment... Health is wealth and they [health workers] don’t need us but we do [need them]. The money we give is nothing compared to the health of our children... At the end of the day, we will grumble on our way home as the services are supposed to be free for our children, yet we are paying for it. The health workers are really trying, but the idea for them to take money from us is bad. And if you don’t give them money, they will talk to you carelessly.”* – Caregiver whose child was fully vaccinated

In a separate domain of monetary exchange, health workers demanded money as a form of ‘punishment’ to caregivers who missed their children’s scheduled vaccination appointments.

*“If you failed to take your baby to the hospital on [the] stipulated date, you will definitely have to pay some amount at the end of the day in the form of punishment. You must pay five thousand or more.”* – Caregiver whose child was fully vaccinated

### 3.2.5. Vaccine side effects

Caregivers cited numerous instances when their children experienced vaccine side effects such as ‘fever,’ ‘swelling at the injection site,’ and the ‘baby becoming lethargic.’ Fever was the most common side effect, and the caregivers knew to administer fever-reducing medication as instructed by health workers.

1  
2  
3 When there was swelling at the injection site, a common practice among caregivers was to massage the  
4 swollen area, sometimes with an onion or a bar of soap to try to reduce the swelling.  
5

6 *“Sometimes my baby’s leg becomes swollen... because some nurses are heavy-handed, and I meet*  
7 *several nurses when I visit the hospital. Sometimes the leg gets swollen, and they treat him. I have*  
8 *to rub the leg to avoid swelling... I use soap to rub off the swelling and I give Panadol to stop the*  
9 *fever... some people say you should not allow every nurse to administer [an] injection to the child.*  
10 *I should have a permanent nurse that gives injection to my child without swelling.” – Caregiver*  
11 *whose child missed a scheduled vaccination*  
12  
13  
14  
15

16  
17 In one rare situation, a caregiver had a prior child who experienced fever, convulsed, and died a few days  
18 after getting vaccinated. Therefore, the caregiver decided to not vaccinate subsequent children.  
19

20 *“After the immunisation, my baby started running temperature, I administered paracetamol as I*  
21 *was told by the health workers. The baby convulsed and that was the end of that baby. I don’t*  
22 *want a repeat of that in my life. I have therefore decided not to take my babies for immunisation*  
23 *anymore” – Caregiver whose child missed a scheduled vaccination*  
24  
25  
26  
27

28 Besides passive acceptance of the BCG vaccine at the birth of the youngest child, this same caregiver  
29 actively refused all other vaccines despite encouragement by a family member to vaccinate the child.  
30

31 *“I’m not outrightly saying it was as a result of the immunisation [that my child died]; as every*  
32 *death is the work of God. But from what I have gathered so far, I have personally decided not to*  
33 *take my baby to the health facility to be immunized. It is not that I’m tired of going to the health*  
34 *facility or because of the distance or money. I do get a lot of pressure from my aunt to take my*  
35 *baby to the health facility for immunisation, but the thing is that I just don’t trust the system and*  
36 *what immunisation does. – Caregiver whose child missed a scheduled vaccination*  
37  
38  
39  
40  
41

42 From the perspective of this same caregiver, the vaccinated child died but the unvaccinated children  
43 survived and thrived, which was cited as a reason for refusing vaccination.  
44

45 *“I believe in exclusive breastfeeding, sometimes for two years and a half and sometimes [only]*  
46 *two years. My baby is now two years seven months old and doing well like any of those children*  
47 *that are on immunisation or have completed...Just as I was saying, sometimes my heart will tell*  
48 *me to take the baby for immunisation but after thinking of the past experience, I would decide not*  
49 *to. I’m now used to that... The simple fact here is that, since the other children are doing well*  
50 *without immunisation, I will not take [the baby] to the health facility for immunisation and that is*  
51 *all.” – Caregiver whose child missed a scheduled vaccination*  
52  
53  
54  
55  
56  
57

### 3.3. Recommendations to improve childhood vaccination (Table 3)

The direct recommendations provided by caregivers were categorized into (1) improving vaccination process and systems and (2) engaging communities to boost vaccine confidence. Implementing community outreach campaigns for immunisation at regular intervals with a focus on defaulters was recommended by participants to improve vaccination outcomes. In addition, caregivers wanted health workers and community leaders to be involved in immunisation promotion along with the CHWs. They wanted the vaccination clinic experience to improve and become more conducive to caregivers, including shorter wait time at the clinic and more positive interactions with health workers. Lastly, caregivers wanted health workers to stop demanding money from them, though they may not mind giving money, out of free-will, as a token of appreciation when they could afford it.

*“In addition, you should engage the Chiefs, because in each area we have Chiefs to spread out this message. You could educate them so that they in turn can educate those in the community. Let us have Town Criers go around disseminating the messages. It would be nice for them to allocate people in the health centre who move from house to house to educate the breastfeeding mothers because some of us are stubborn to come onboard.”* – Caregiver whose child was fully vaccinated

## 4. Discussion

Our qualitative analysis highlighted several important themes. In the backdrop of anticipated benefits to both the child and parent, vaccination intention was motivated by a feeling of parental responsibility to ‘do the right thing.’ Timely and trusted exchange of information together with social support and positive experiences at the vaccination clinic were important facilitators of vaccination. In contrast, vaccination was discouraged by negative interactions with health workers at the clinic, the occurrence and fear of vaccine side effects, multitude of ‘hidden’ costs, juggling vaccination with other responsibilities, and inconveniences, such as long traveling time to the clinic and long delays at the clinic. Nevertheless, caregivers were resilient in devising ways to try to get their children vaccinated such as walking on foot up to an hour to get to the clinic when they could not afford public transportation. Lastly, caregivers wanted the vaccination experience to improve, and they desired stronger community engagement to help optimize vaccination outcomes. However, systemic issues, such as informal payments, overcrowding in health facilities, and the reported overburdened health workers may require interventions at the health systems level. These themes from Sierra Leone provide in-depth insights regarding the motivations, facilitators, and barriers of vaccination in an urban LMIC setting.

1  
2  
3  
4  
5 Moral values may shape vaccination attitudes.<sup>22</sup> Philosophical arguments regarding the morality of  
6 vaccination have been heavily debated.<sup>23-26</sup> Caregivers in our sample largely viewed vaccination via a  
7 moral lens encompassing parental duty to do the right thing for the child. In one situation, however, we  
8 found that the desire to ‘do the right thing’ may also translate into vaccination refusal in the backdrop of  
9 other past refusals, observing ‘healthy unvaccinated’ children, and having distrust of the health system.  
10 Quantitative research from high-income countries has shown that parents with unvaccinated children were  
11 more likely to perceive their children to be at low risk of vaccine-preventable diseases and were more  
12 likely to perceive low vaccine effectiveness and safety compared to parents with vaccinated children.<sup>27</sup>  
13 Our findings suggest that childhood immunisation communication efforts may resonate more strongly  
14 with caregivers when vaccination is framed around parental responsibilities to do the right thing for the  
15 child and the anticipated future benefits to parents. However, additional research is necessary to generate  
16 a better understanding of the morality of childhood vaccination in the Sierra Leonean context.  
17  
18  
19  
20  
21  
22  
23  
24

25 Across the interviews, there was an apparent tension in the relationship between caregivers and health  
26 workers. Caregivers often expressed their appreciation of health workers and empathized with the  
27 challenging context in which they do their work. Health workers were strongly viewed as authoritative  
28 sources of trusted information regarding immunisation and the child’s health, which is consistent with  
29 findings from high-income countries<sup>28-30</sup> and LMICs.<sup>31 32</sup> Our findings on the role of monetary exchange  
30 in vaccination exemplify the complex relationship between caregivers and health workers in low-resource  
31 urban communities in Sierra Leone. Some caregivers voluntarily gave money to health workers as a  
32 ‘token of appreciation’ while others begrudgingly gave money because they viewed it as a condition for  
33 receiving good quality service from health workers. Interventions at the health systems level are  
34 necessary to help discourage informal payments to health workers—a practice that may perpetuate  
35 vaccination inequities among poor caregivers who are unable to meet monetary expectations.  
36  
37  
38  
39  
40  
41  
42  
43

44 Our findings also illuminate the need for interventions at the household and family level. Fathers were  
45 rarely involved in taking their children to the vaccination clinic but were often engaged in the decision-  
46 making processes. In the few instances when fathers were involved in taking their children to the clinic,  
47 the mothers felt supported, and their children were fully vaccinated. A study in Nigeria found that  
48 paternal involvement in immunisation was greater in rural settings compared to urban settings.<sup>33</sup> In urban  
49 areas, the same study found that paternal involvement was greater among educated fathers compared to  
50 uneducated fathers. In a separate study in Ghana, the involvement of educated fathers in the vaccination  
51 decision was associated with timelier vaccination uptake compared to the involvement of uneducated  
52  
53  
54  
55  
56  
57



1  
2  
3 fathers in the decision.<sup>34</sup> More broadly, shifting from a mother-child dyad to a family triad in the care of  
4 children has proven to have positive effects on paediatric health outcomes across diverse contexts.<sup>35</sup>  
5 Additional assessments and interventions are needed to explore and evaluate culturally appropriate ways  
6 to enhance the involvement of fathers in childhood immunisation in Sierra Leone and other similar LMIC  
7 settings.  
8  
9  
10

11  
12 Existing evidence suggests that vaccine safety concerns, often linked to adverse events following  
13 immunisation (AEFI), contribute to vaccine hesitancy.<sup>36 37</sup> Serious AEFIs may be ‘triggering events’ for  
14 derailing vaccine confidence and prompting active refusal among certain caregivers and their  
15 communities—especially when the serious AEFI is perceived to be linked to the vaccine or the  
16 vaccination process.<sup>38</sup> Together with prior evidence, these findings emphasize the need for robust AEFI  
17 surveillance and investigations<sup>39</sup> to identify, counsel, and follow-up with caregivers whose children  
18 experience AEFI, and therefore, are potentially at risk of missing subsequent vaccination. Health workers  
19 and CHWs may benefit from periodic in-service training on how to effectively communicate vaccine  
20 safety and address concerns about AEFIs.<sup>40</sup>  
21  
22  
23  
24  
25  
26  
27

#### 28 **4.1. Limitations**

29  
30 There were several limitations to our assessment. First, it is possible that some nuanced meaning may  
31 have been lost when translating the audio recordings from Krio to English—especially since the  
32 transcripts were not back-translated from English to Krio due to resource constraints. Second, we only  
33 identified one caregiver who routinely and actively refused all vaccines for her child after experiencing a  
34 serious AEFI, which may reflect the overall rarity of zero-dose unvaccinated children in Sierra Leone  
35 (approximately 3%).<sup>41</sup> This was the only caregiver with a child that experienced a serious AEFI in our  
36 sample, which limits our ability to have a rich understanding of such experience among caregivers more  
37 broadly and the potential linkages to vaccination refusal. Although such experiences of serious AEFI are  
38 rare, they may have the tendency to get publicized in the community, which may negatively influence  
39 vaccination decisions among other caregivers. Taken together, our results call for additional qualitative  
40 assessments to get a deeper understanding of vaccination refusal within the Sierra Leonean context and  
41 other low-resource LMIC settings. Sampling strategies may therefore need to be adapted accordingly to  
42 focus on caregivers who actively refuse vaccination for their children. Lastly, our findings reflected  
43 gender dimensions that may be based on sociocultural norms in Sierra Leonean society but may also be  
44 due to sampling bias because the caregivers we conveniently recruited were mostly stay-at-home mothers.  
45  
46  
47  
48  
49  
50  
51  
52  
53  
54

#### 55 **5. Conclusions**

1  
2  
3 As the COVID-19 pandemic disrupts childhood immunisation globally,<sup>42</sup> especially in LMICs, our  
4 assessment provides a foundational understanding of the challenges that caregivers encounter in urban  
5 settings in Sierra Leone. It also sheds light on opportunities to improve vaccination outcomes in urban  
6 poor settings, which is a global immunisation priority. The findings show that health system  
7 interventions, community engagement, and vaccination outreach may need to be tailored to for urban  
8 settings. Vaccine communication efforts may resonate more strongly with caregivers when vaccination is  
9 framed both around parental responsibilities to do the right thing for the child and the future benefits to  
10 the parent.  
11  
12  
13  
14  
15

### 16 17 **Competing interests**

18 None declared.  
19  
20  
21

### 22 **Data availability**

23 All data relevant to the study are included in the article or uploaded as supplementary information.  
24  
25  
26

### 27 **Contributors**

28 MFJ, RS, MT, TS, and ML designed the assessment. MFJ, PP, SK, and KW analysed the data. MJF, PP,  
29 RS, SK, MT, KW, TS, and ML contributed to the interpretation of the results. MFJ, PP and SK drafted  
30 the manuscript. RS, MT, KW, TS, and ML contributed to revising the manuscript. All authors reviewed  
31 and approved the final manuscript.  
32  
33  
34  
35  
36

### 37 **Collaborators**

38 Adewale Akinjeji, Laura Conklin, Oliver Eleeza, Lauren E Parmley, Anthony Mansaray, Dimitri  
39 Prybylski, Roberta Sutton, Mame Toure, Aaron Wallace, Brent Wolff  
40  
41  
42

### 43 **Acknowledgements**

44 We thank the 16 caregivers who participated in the in-depth interviews.  
45  
46  
47

### 48 **Funding**

49 U.S. Centers for Disease Control and Prevention (U19GGH001581).  
50  
51  
52

### 53 **Disclaimer**

54  
55  
56  
57  
58  
59  
60

The findings and conclusions in this paper are those of the authors and do not necessarily represent the official position of the US Centres for Disease Control and Prevention.

## 6. References

1. Nelson KN, Wallace AS, Sodha SV, et al. Assessing strategies for increasing urban routine immunization coverage of childhood vaccines in low and middle-income countries: A systematic review of peer-reviewed literature. *Vaccine* 2016;34(46):5495-503. doi: 10.1016/j.vaccine.2016.09.038 [published Online First: 2016/10/25]
2. John Snow International. Strengthening Immunization for the Urban Poor: Experiences and Lessons Learned from Five Country Studies, 2018. Available: <https://www.jsi.com/resource/strengthening-immunization-for-the-urban-poor-experiences-and-lessons-learned-from-five-country-studies/> [accessed November 12 2020].
3. Brolin Ribacke KJ, Saulnier DD, Eriksson A, et al. Effects of the West Africa Ebola Virus Disease on Health-Care Utilization - A Systematic Review. *Frontiers in public health* 2016;4:222. doi: 10.3389/fpubh.2016.00222 [published Online First: 2016/10/26]
4. Elston JW, Cartwright C, Ndumbi P, et al. The health impact of the 2014-15 Ebola outbreak. *Public health* 2017;143:60-70. doi: 10.1016/j.puhe.2016.10.020 [published Online First: 2017/02/06]
5. Yerger P, Jalloh M, Coltart CEM, et al. Barriers to maternal health services during the Ebola outbreak in three West African countries: a literature review. *BMJ Glob Health* 2020;5(9) doi: 10.1136/bmjgh-2020-002974 [published Online First: 2020/09/09]
6. Masresha BG, Luce R, Jr., Weldegebriel G, et al. The impact of a prolonged ebola outbreak on measles elimination activities in Guinea, Liberia and Sierra Leone, 2014-2015. *Pan Afr Med J* 2020;35(Suppl 1):8. doi: 10.11604/pamj.supp.2020.35.1.19059 [published Online First: 2020/05/07]
7. Government of Sierra Leone. National Ebola Recovery Strategy for Sierra Leone, 2015. Available: [https://ebolaresponse.un.org/sites/default/files/sierra\\_leone\\_-\\_national\\_recovery\\_strategy\\_2015-2017.pdf](https://ebolaresponse.un.org/sites/default/files/sierra_leone_-_national_recovery_strategy_2015-2017.pdf) [accessed December 5 2020].
8. U.S. Centers for Disease Control and Prevnetion. Global Health – Sierra Leone, 2019. Available: <https://www.cdc.gov/globalhealth/countries/sierra-leone/default.htm> [accessed December 5 2020].
9. Feldstein LR, Sutton R, Jalloh MF, et al. Access, demand, and utilization of childhood immunization services: A cross-sectional household survey in Western Area Urban district, Sierra Leone, 2019. *Journal of global health* 2020;10(1):010420. doi: 10.7189/jogh.10.010420 [published Online First: 2020/06/09]
10. UNICEF. Human Centered Design 4 Health, 2018. Available: <https://www.hcd4health.org/> [accessed November 18 2020].
11. Jalloh MF, Kinsman J, Conteh J, et al. Barriers and facilitators to reporting deaths following Ebola surveillance in Sierra Leone: implications for sustainable mortality surveillance based on an exploratory qualitative assessment. *BMJ Open* 2021;11(5):e042976. doi: 10.1136/bmjopen-2020-042976 [published Online First: 2021/05/15]
12. Diekelmann NL. Learning-as-testing: a Heideggerian hermeneutical analysis of the lived experiences of students and teachers in nursing. *ANS Advances in nursing science* 1992;14(3):72-83. doi: 10.1097/00012272-199203000-00010 [published Online First: 1992/03/01]
13. Dreyfus HL. Being-in-the-world: A commentary on Heidegger's Being and Time. Cambridge: The MIT Press 1991.
14. Dahlberg K. The essence of essences – the search for meaning structures in phenomenological analysis of lifeworld phenomena. *International journal of qualitative studies on health and well-being* 2006;1(1):11-19. doi: 10.1080/17482620500478405

15. Statistics Sierra Leone. 2015 Sierra Leone Population and Housing Census, 2016. Available: <https://www.statistics.sl/index.php/census/census-2015.html> [accessed November 12 2020].
16. Lamunu M, Olu OO, Bangura J, et al. Epidemiology of Ebola Virus Disease in the Western Area Region of Sierra Leone, 2014-2015. *Frontiers in public health* 2017;5:33. doi: 10.3389/fpubh.2017.00033
17. World Health Organization. Medical doctors per 10,000 population, 2021. Available: <https://www.who.int/data/gho/data/indicators/indicator-details/GHO> [accessed December 5 2021].
18. Witter S, Brikci N, Harris T, et al. The free healthcare initiative in Sierra Leone: Evaluating a health system reform, 2010-2015. *The International journal of health planning and management* 2018;33(2):434-48. doi: 10.1002/hpm.2484
19. Government of Sierra Leone. Comprehensive EPI Multi-Year Plan 2017-2021, 2016. Available: <https://www.gavi.org/sites/default/files/document/2021/cMYP%20Sierra%20Leone%202017-2021.pdf> [accessed December 5 2020].
20. Government of Sierra Leone. Policy for Community Health Workers in Sierra Leone, 2012. Available: <https://chwcentral.org/wp-content/uploads/2015/01/CHW-Policy-Sierra-Leone.pdf> [accessed December 5 2020].
21. Malterud K, Siersma VD, Guassora AD. Sample Size in Qualitative Interview Studies: Guided by Information Power. *Qualitative health research* 2016;26(13):1753-60. doi: 10.1177/1049732315617444
22. Amin AB, Bednarczyk RA, Ray CE, et al. Association of moral values with vaccine hesitancy. *Nature human behaviour* 2017;1(12):873-80. doi: 10.1038/s41562-017-0256-5
23. Di Pietro ML, Poscia A, Telesman AA, et al. Vaccine hesitancy: parental, professional and public responsibility. *Annali dell'Istituto superiore di sanita* 2017;53(2):157-62. doi: 10.4415/ann\_17\_02\_13
24. Giubilini A, Douglas T, Savulescu J. The moral obligation to be vaccinated: utilitarianism, contractualism, and collective easy rescue. *Medicine, health care, and philosophy* 2018;21(4):547-60. doi: 10.1007/s11019-018-9829-y [published Online First: 2018/02/13]
25. Bester JC. Measles Vaccination is Best for Children: The Argument for Relying on Herd Immunity Fails. *Journal of bioethical inquiry* 2017;14(3):375-84. doi: 10.1007/s11673-017-9799-4
26. Dawson A. What are the moral obligations of the traveller in relation to vaccination? *Travel medicine and infectious disease* 2007;5(2):90-6. doi: 10.1016/j.tmaid.2006.01.005
27. Omer SB, Salmon DA, Orenstein WA, et al. Vaccine refusal, mandatory immunization, and the risks of vaccine-preventable diseases. *N Engl J Med* 2009;360(19):1981-8. doi: 10.1056/NEJMsa0806477
28. Frew PM, Chung Y, Fisher AK, et al. Parental experiences with vaccine information statements: Implications for timing, delivery, and parent-provider immunization communication. *Vaccine* 2016;34(48):5840-44. doi: 10.1016/j.vaccine.2016.10.026
29. Drezner D, Youngster M, Klainer H, et al. Maternal vaccinations coverage and reasons for non-compliance - a cross-sectional observational study. *BMC pregnancy and childbirth* 2020;20(1):541. doi: 10.1186/s12884-020-03243-w
30. Wiley KE, Massey PD, Cooper SC, et al. Pregnant women's intention to take up a post-partum pertussis vaccine, and their willingness to take up the vaccine while pregnant: a cross sectional survey. *Vaccine* 2013;31(37):3972-8. doi: 10.1016/j.vaccine.2013.06.015
31. Makwe CC, Anorlu RI. Knowledge of and attitude toward human papillomavirus infection and vaccines among female nurses at a tertiary hospital in Nigeria. *International journal of women's health* 2011;3:313-7. doi: 10.2147/ijwh.S22792
32. Foss HS, Oldervoll A, Fretheim A, et al. Communication around HPV vaccination for adolescents in low- and middle-income countries: a systematic scoping overview of systematic reviews. *Systematic reviews* 2019;8(1):190. doi: 10.1186/s13643-019-1100-y

- 1  
2  
3 33. Sodeinde K, Amoran O, Abiodun O, et al. A rural/urban comparison of paternal involvement in  
4 childhood immunisation in Ogun Central Senatorial District, Nigeria. *The Nigerian postgraduate*  
5 *medical journal* 2020;27(4):336-42. doi: 10.4103/npmj.npmj\_101\_20  
6  
7 34. Brugha RF, Kevany JP, Swan AV. An investigation of the role of fathers in immunization uptake. *Int*  
8 *J Epidemiol* 1996;25(4):840-5. doi: 10.1093/ije/25.4.840  
9  
10 35. Allport BS, Johnson S, Aqil A, et al. Promoting Father Involvement for Child and Family Health.  
11 *Acad Pediatr* 2018;18(7):746-53. doi: 10.1016/j.acap.2018.03.011  
12  
13 36. Dube E, Laberge C, Guay M, et al. Vaccine hesitancy: an overview. *Human vaccines &*  
14 *immunotherapeutics* 2013;9(8):1763-73. doi: 10.4161/hv.24657  
15  
16 37. Larson HJ, Jarrett C, Eckersberger E, et al. Understanding vaccine hesitancy around vaccines and  
17 vaccination from a global perspective: a systematic review of published literature, 2007-2012.  
18 *Vaccine* 2014;32(19):2150-9. doi: 10.1016/j.vaccine.2014.01.081  
19  
20 38. Du F, Chantler T, Francis MR, et al. The determinants of vaccine hesitancy in China: A cross-  
21 sectional study following the Changchun Changsheng vaccine incident. *Vaccine*  
22 2020;38(47):7464-71. doi: 10.1016/j.vaccine.2020.09.075  
23  
24 39. World Health Organization. Adverse events following immunization (AEFI) 2021. Available:  
25 [https://www.who.int/immunization/monitoring\\_surveillance/who-immuniz.pdf](https://www.who.int/immunization/monitoring_surveillance/who-immuniz.pdf) [accessed  
26 February 18 2021].  
27  
28 40. World Health Organization. Vaccine safety basics e-learning course, 2021. Available:  
29 <https://vaccine-safety-training.org/simplified-and-key-messages.html> [accessed February 19]  
30 2021.  
31  
32 41. UNICEF. Sierra Leone Multiple Indicators Cluster Survey 2017. Available:  
33 [https://mics.unicef.org/news\\_entries/106/SIERRA-LEONE-2017-MICS-RELEASED](https://mics.unicef.org/news_entries/106/SIERRA-LEONE-2017-MICS-RELEASED) [accessed  
34 January 21 2021].  
35  
36 42. Abbas K, Procter SR, van Zandvoort K, et al. Routine childhood immunisation during the COVID-19  
37 pandemic in Africa: a benefit-risk analysis of health benefits versus excess risk of SARS-CoV-2  
38 infection. *Lancet Glob Health* 2020;8(10):e1264-e72. doi: 10.1016/s2214-109x(20)30308-9  
39  
40  
41  
42  
43  
44  
45  
46  
47  
48  
49  
50  
51  
52  
53  
54  
55  
56  
57  
58  
59  
60

**Table 1. Enablers of childhood vaccination—Western Area Urban, Sierra Leone, 2018**

| Meaning unit                                           | Category                                    | Sub-themes                                  | Theme                                    |
|--------------------------------------------------------|---------------------------------------------|---------------------------------------------|------------------------------------------|
| Responsibility to ensure full vaccination              | Parental responsibility                     | Emotional enablers of childhood vaccination | Enablers of childhood vaccination        |
| Obligation to do the right thing                       |                                             |                                             |                                          |
| Immunisation as a requirement                          | Wanting a ‘strong and healthy baby’         |                                             |                                          |
| Immunisation is important for baby’s health            |                                             |                                             |                                          |
| Wanting ‘strong baby’                                  |                                             |                                             |                                          |
| ‘Health is wealth’                                     | Parental anticipation of reciprocal benefit |                                             |                                          |
| Defaulting on vaccination risks baby’s life            |                                             |                                             |                                          |
| Vaccination benefits the parent later in life          | Diversity of immunisation reminders         | Practical enablers of childhood vaccination |                                          |
| Taking care of parents when old                        |                                             |                                             |                                          |
| Immunisation card is important                         |                                             |                                             |                                          |
| Campaign as reminder                                   |                                             |                                             |                                          |
| Reminders by health workers at vaccination visit       |                                             |                                             |                                          |
| Husband as reminder                                    |                                             |                                             |                                          |
| Immunisation card as reminder                          |                                             |                                             |                                          |
| Other family member as reminder                        |                                             |                                             |                                          |
| Nurses should lead                                     |                                             |                                             | Information access and information trust |
| Nurses more trusted than CHWs                          |                                             |                                             |                                          |
| Same information from different sources                |                                             |                                             |                                          |
| Immunisation promotion through radio/tv                |                                             |                                             |                                          |
| Immunisation promotion by health workers               |                                             |                                             |                                          |
| Immunisation promotion through leaders                 |                                             |                                             |                                          |
| Immunisation promotion by NGOs                         | Getting fathers more involved               |                                             |                                          |
| Mothers take the child to the clinic                   |                                             |                                             |                                          |
| Fathers rarely involved                                |                                             |                                             |                                          |
| Father received an award for involvement               | Positive experiences with health worker     |                                             |                                          |
| Cordial relationship with nurses                       |                                             |                                             |                                          |
| Good care by nurses                                    |                                             |                                             |                                          |
| HWs encourage seeking care at HF                       |                                             |                                             |                                          |
| Giving money to health worker as token of appreciation | Post-vaccination information sharing        |                                             |                                          |
| Husband asking about the visit                         |                                             |                                             |                                          |
| Informing husband of next visit                        |                                             |                                             |                                          |
| Telling husband about visit expenses                   |                                             |                                             |                                          |
| Immunisation is a “learning process”                   |                                             |                                             |                                          |
| Sharing experiences with neighbours or friends         |                                             |                                             |                                          |
| Other family members asking about the visit            |                                             |                                             |                                          |

**Table 2. Barriers related to childhood vaccination–Western Area Urban, Sierra Leone, 2018**

| Meaning unit                                     | Category                                            | Sub-themes                               | Themes                                    |
|--------------------------------------------------|-----------------------------------------------------|------------------------------------------|-------------------------------------------|
| Asking husband for money                         | Preparing for the journey and getting to the clinic | Practical constraints                    | Barriers related to childhood vaccination |
| Juggling different household duties              |                                                     |                                          |                                           |
| Competing priorities                             |                                                     |                                          |                                           |
| Time taken to get to the clinic                  |                                                     |                                          |                                           |
| Wasting time at the clinic                       |                                                     |                                          |                                           |
| Rush to arrive first and seen first              |                                                     |                                          |                                           |
| Crowding at the clinic                           |                                                     |                                          |                                           |
| Very long wait at larger health facilities       |                                                     |                                          |                                           |
| Spent a day and nothing happened                 |                                                     |                                          |                                           |
| Wasting caregiver's time                         |                                                     |                                          |                                           |
| Not respecting caregivers                        | Feeling disrespected by health workers              | Negative experiences with health workers |                                           |
| Shouting at caregivers                           |                                                     |                                          |                                           |
| Paying for the card                              | Monetary expectations                               |                                          |                                           |
| Paying for free drugs                            |                                                     |                                          |                                           |
| Paying for weighing                              |                                                     |                                          |                                           |
| Payment as punishment                            |                                                     |                                          |                                           |
| Bad care without payment                         |                                                     |                                          |                                           |
| Health workers should stop demanding money       |                                                     |                                          |                                           |
| Health worker don't appreciate less than Le 2000 |                                                     |                                          |                                           |
| Health workers withholding free drugs            |                                                     |                                          |                                           |
| Baby crying throughout the night                 |                                                     | Vaccine side effects                     | Safety concerns                           |
| Baby gets 'lazy' for few hours                   |                                                     |                                          |                                           |
| Fever in baby                                    |                                                     |                                          |                                           |
| Swelling at injection site                       |                                                     |                                          |                                           |
| Side effects only for some vaccines              |                                                     |                                          |                                           |
| Rub onion on swollen injection site              |                                                     |                                          |                                           |
| Avoiding abnormalities from vaccine              |                                                     |                                          |                                           |
| Afraid of vaccine side effects                   |                                                     |                                          |                                           |

**Table 3. Recommendations to improve childhood vaccination– Western Area Urban, Sierra Leone, 2018**

| Meaning unit                             | Category                                    | Sub-theme                                                               | Theme                                            |
|------------------------------------------|---------------------------------------------|-------------------------------------------------------------------------|--------------------------------------------------|
| Continue campaigns at repeated intervals | Improving vaccination processes and systems | Caregivers want improved vaccination processes, systems, and engagement | Recommendations to improve childhood vaccination |
| Do not rely on campaigns alone           |                                             |                                                                         |                                                  |
| Provision of incentives for caregivers   |                                             |                                                                         |                                                  |
| Concentrate on defaulters                |                                             |                                                                         |                                                  |
| Compensation/incentives for nurses       |                                             |                                                                         |                                                  |
| Being considerate towards health workers |                                             |                                                                         |                                                  |
| Employ more staff                        |                                             |                                                                         |                                                  |
| Stop demanding money                     | Engaging communities to                     |                                                                         |                                                  |
| Promote consequences of not vaccinating  |                                             |                                                                         |                                                  |
| Peer-to-peer promotion of immunisation   |                                             |                                                                         |                                                  |

|    |                                              |                          |  |  |
|----|----------------------------------------------|--------------------------|--|--|
| 1  | Inform about importance of immunisation      | boost vaccine confidence |  |  |
| 2  | Address 'stubborn' caregivers                |                          |  |  |
| 3  | Engage caregivers who do not want injections |                          |  |  |
| 4  |                                              |                          |  |  |
| 5  |                                              |                          |  |  |
| 6  |                                              |                          |  |  |
| 7  |                                              |                          |  |  |
| 8  |                                              |                          |  |  |
| 9  |                                              |                          |  |  |
| 10 |                                              |                          |  |  |
| 11 |                                              |                          |  |  |
| 12 |                                              |                          |  |  |
| 13 |                                              |                          |  |  |
| 14 |                                              |                          |  |  |
| 15 |                                              |                          |  |  |
| 16 |                                              |                          |  |  |
| 17 |                                              |                          |  |  |
| 18 |                                              |                          |  |  |
| 19 |                                              |                          |  |  |
| 20 |                                              |                          |  |  |
| 21 |                                              |                          |  |  |
| 22 |                                              |                          |  |  |
| 23 |                                              |                          |  |  |
| 24 |                                              |                          |  |  |
| 25 |                                              |                          |  |  |
| 26 |                                              |                          |  |  |
| 27 |                                              |                          |  |  |
| 28 |                                              |                          |  |  |
| 29 |                                              |                          |  |  |
| 30 |                                              |                          |  |  |
| 31 |                                              |                          |  |  |
| 32 |                                              |                          |  |  |
| 33 |                                              |                          |  |  |
| 34 |                                              |                          |  |  |
| 35 |                                              |                          |  |  |
| 36 |                                              |                          |  |  |
| 37 |                                              |                          |  |  |
| 38 |                                              |                          |  |  |
| 39 |                                              |                          |  |  |
| 40 |                                              |                          |  |  |
| 41 |                                              |                          |  |  |
| 42 |                                              |                          |  |  |
| 43 |                                              |                          |  |  |
| 44 |                                              |                          |  |  |
| 45 |                                              |                          |  |  |
| 46 |                                              |                          |  |  |
| 47 |                                              |                          |  |  |
| 48 |                                              |                          |  |  |
| 49 |                                              |                          |  |  |
| 50 |                                              |                          |  |  |
| 51 |                                              |                          |  |  |
| 52 |                                              |                          |  |  |
| 53 |                                              |                          |  |  |
| 54 |                                              |                          |  |  |
| 55 |                                              |                          |  |  |
| 56 |                                              |                          |  |  |
| 57 |                                              |                          |  |  |
| 58 |                                              |                          |  |  |
| 59 |                                              |                          |  |  |
| 60 |                                              |                          |  |  |

For peer review only



## COREQ (CONsolidated criteria for REporting Qualitative research) Checklist

A checklist of items that should be included in reports of qualitative research. You must report the page number in your manuscript where you consider each of the items listed in this checklist. If you have not included this information, either revise your manuscript accordingly before submitting or note N/A.

| Topic                                          | Item No. | Guide Questions/Description                                                                                                                              | Reported on Page No. |
|------------------------------------------------|----------|----------------------------------------------------------------------------------------------------------------------------------------------------------|----------------------|
| <b>Domain 1: Research team and reflexivity</b> |          |                                                                                                                                                          |                      |
| <i>Personal characteristics</i>                |          |                                                                                                                                                          |                      |
| Interviewer/facilitator                        | 1        | Which author/s conducted the interview or focus group?                                                                                                   |                      |
| Credentials                                    | 2        | What were the researcher's credentials? E.g. PhD, MD                                                                                                     |                      |
| Occupation                                     | 3        | What was their occupation at the time of the study?                                                                                                      |                      |
| Gender                                         | 4        | Was the researcher male or female?                                                                                                                       |                      |
| Experience and training                        | 5        | What experience or training did the researcher have?                                                                                                     |                      |
| <i>Relationship with participants</i>          |          |                                                                                                                                                          |                      |
| Relationship established                       | 6        | Was a relationship established prior to study commencement?                                                                                              |                      |
| Participant knowledge of the interviewer       | 7        | What did the participants know about the researcher? e.g. personal goals, reasons for doing the research                                                 |                      |
| Interviewer characteristics                    | 8        | What characteristics were reported about the interviewer/facilitator? e.g. Bias, assumptions, reasons and interests in the research topic                |                      |
| <b>Domain 2: Study design</b>                  |          |                                                                                                                                                          |                      |
| <i>Theoretical framework</i>                   |          |                                                                                                                                                          |                      |
| Methodological orientation and Theory          | 9        | What methodological orientation was stated to underpin the study? e.g. grounded theory, discourse analysis, ethnography, phenomenology, content analysis |                      |
| <i>Participant selection</i>                   |          |                                                                                                                                                          |                      |
| Sampling                                       | 10       | How were participants selected? e.g. purposive, convenience, consecutive, snowball                                                                       |                      |
| Method of approach                             | 11       | How were participants approached? e.g. face-to-face, telephone, mail, email                                                                              |                      |
| Sample size                                    | 12       | How many participants were in the study?                                                                                                                 |                      |
| Non-participation                              | 13       | How many people refused to participate or dropped out? Reasons?                                                                                          |                      |
| <i>Setting</i>                                 |          |                                                                                                                                                          |                      |
| Setting of data collection                     | 14       | Where was the data collected? e.g. home, clinic, workplace                                                                                               |                      |
| Presence of non-participants                   | 15       | Was anyone else present besides the participants and researchers?                                                                                        |                      |
| Description of sample                          | 16       | What are the important characteristics of the sample? e.g. demographic data, date                                                                        |                      |
| <i>Data collection</i>                         |          |                                                                                                                                                          |                      |
| Interview guide                                | 17       | Were questions, prompts, guides provided by the authors? Was it pilot tested?                                                                            |                      |
| Repeat interviews                              | 18       | Were repeat interviews carried out? If yes, how many?                                                                                                    |                      |
| Audio/visual recording                         | 19       | Did the research use audio or visual recording to collect the data?                                                                                      |                      |
| Field notes                                    | 20       | Were field notes made during and/or after the interview or focus group?                                                                                  |                      |
| Duration                                       | 21       | What was the duration of the interviews or focus group?                                                                                                  |                      |
| Data saturation                                | 22       | Was data saturation discussed?                                                                                                                           |                      |
| Transcripts returned                           | 23       | Were transcripts returned to participants for comment and/or                                                                                             |                      |

| Topic                                  | Item No. | Guide Questions/Description                                                                                                        | Reported on Page No. |
|----------------------------------------|----------|------------------------------------------------------------------------------------------------------------------------------------|----------------------|
|                                        |          | correction?                                                                                                                        |                      |
| <b>Domain 3: analysis and findings</b> |          |                                                                                                                                    |                      |
| <i>Data analysis</i>                   |          |                                                                                                                                    |                      |
| Number of data coders                  | 24       | How many data coders coded the data?                                                                                               |                      |
| Description of the coding tree         | 25       | Did authors provide a description of the coding tree?                                                                              |                      |
| Derivation of themes                   | 26       | Were themes identified in advance or derived from the data?                                                                        |                      |
| Software                               | 27       | What software, if applicable, was used to manage the data?                                                                         |                      |
| Participant checking                   | 28       | Did participants provide feedback on the findings?                                                                                 |                      |
| <i>Reporting</i>                       |          |                                                                                                                                    |                      |
| Quotations presented                   | 29       | Were participant quotations presented to illustrate the themes/findings?<br>Was each quotation identified? e.g. participant number |                      |
| Data and findings consistent           | 30       | Was there consistency between the data presented and the findings?                                                                 |                      |
| Clarity of major themes                | 31       | Were major themes clearly presented in the findings?                                                                               |                      |
| Clarity of minor themes                | 32       | Is there a description of diverse cases or discussion of minor themes?                                                             |                      |

Developed from: Tong A, Sainsbury P, Craig J. Consolidated criteria for reporting qualitative research (COREQ): a 32-item checklist for interviews and focus groups. *International Journal for Quality in Health Care*. 2007. Volume 19, Number 6: pp. 349 – 357

**Once you have completed this checklist, please save a copy and upload it as part of your submission. DO NOT include this checklist as part of the main manuscript document. It must be uploaded as a separate file.**
